# Supplementary material
Source: PubMed Central journal article supplement (PMC3605979)
Supplement: supp_M033837_jlr.M033837-1.pdf [file supp_M033837_jlr.M033837-1.pdf]

## Simulation of triacylglycerol ion profiles: Bioinformatics for interpretation of triacylglycerol biosyntheses

Rowland H. Han, Miao Wang, Xiaoling Fang, and Xianlin Han  
Diabetes and Obesity Research Center  
Sanford-Burnham Medical Research Institute  
Orlando, FL 32827

**Table S1.** Mass levels of individual species of phosphatidylinositol, phosphatidic acid, and triacylglycerol determined by MDMS-SL as well as mass levels of fatty acyl chains in triacylglycerol derived from MS analysis and mass levels of acyl-CoA determined by MALDI-TOF/MS

| Species                                            | <i>m/z</i> or Mass | Mean $\pm$ SD   |
|----------------------------------------------------|--------------------|-----------------|
| <b>Heart</b>                                       |                    |                 |
| <b>Phosphatidylinositol (PI) (nmol/mg protein)</b> |                    |                 |
| 16:0-18:2                                          | 833.518            | 0.06 $\pm$ 0.00 |
| 16:0-20:4                                          | 857.518            | 0.23 $\pm$ 0.00 |
| 18:1-18:2                                          | 859.534            | 0.12 $\pm$ 0.01 |
| 18:0-18:2                                          | 861.549            | 0.37 $\pm$ 0.04 |
| 18:0-18:1                                          | 863.565            | 0.04 $\pm$ 0.01 |
| 18:2-20:4                                          | 881.518            | 0.04 $\pm$ 0.00 |
| 16:0-22:6                                          | 881.518            | 0.02 $\pm$ 0.00 |
| 18:1-20:4                                          | 883.534            | 0.36 $\pm$ 0.04 |
| 18:0-20:4                                          | 885.549            | 4.95 $\pm$ 0.60 |
| 18:0-20:3                                          | 887.565            | 0.37 $\pm$ 0.04 |
| 18:0-20:2                                          | 889.581            | 0.02 $\pm$ 0.00 |
| 18:0-22:6                                          | 909.549            | 0.21 $\pm$ 0.03 |
| 18:0-22:5                                          | 911.565            | 0.12 $\pm$ 0.01 |
| 18:0-22:4                                          | 913.581            | 0.05 $\pm$ 0.01 |
| Sum                                                |                    | 6.95 $\pm$ 0.72 |
| <b>Phosphatidic acid (PA) (pmol/mg protein)</b>    |                    |                 |
| 16:0-16:0                                          | 647.466            | 11.3 $\pm$ 1.9  |
| 16:0-18:2                                          | 671.466            | 11.4 $\pm$ 0.5  |
| 16:0-18:1                                          | 673.481            | 47.3 $\pm$ 0.7  |
| 18:0-18:2                                          | 699.497            | 5.1 $\pm$ 0.3   |
| 18:1-18:1                                          | 699.497            | 5.1 $\pm$ 0.2   |
| 18:0-18:1                                          | 701.513            | 0.9 $\pm$ 0.1   |
| Sum                                                |                    | 81.0 $\pm$ 1.7  |
| <b>Triacylglycerol (TAG) (nmol/mg protein)</b>     |                    |                 |
| C46:2                                              | 781.690            | 0.08 $\pm$ 0.00 |
| C46:1/C47:8                                        | 783.705            | 0.10 $\pm$ 0.00 |
| C46:0/C47:7                                        | 785.721            | 0.06 $\pm$ 0.01 |
| C47:0/C48:7                                        | 799.737            | 0.12 $\pm$ 0.00 |
| C48:2/C49:9                                        | 809.721            | 0.17 $\pm$ 0.05 |
| C48:1/C49:8                                        | 811.737            | 0.29 $\pm$ 0.08 |
| C48:0/C49:7                                        | 813.752            | 0.22 $\pm$ 0.06 |
| C50:4                                              | 833.721            | 0.08 $\pm$ 0.02 |
| C50:3/C51:10                                       | 835.737            | 0.41 $\pm$ 0.11 |
| C50:2/C51:9                                        | 837.752            | 1.28 $\pm$ 0.36 |

|                    |         |           |
|--------------------|---------|-----------|
| C50:1/C51:8        | 839.768 | 1.50±0.42 |
| C50:0/C51:7        | 841.784 | 0.19±0.04 |
| C51:3/C52:10       | 849.752 | 0.05±0.01 |
| C51:2/C52:9        | 851.768 | 0.70±0.02 |
| C51:1/C52:8        | 853.690 | 0.15±0.02 |
| C51:0/C52:7        | 855.705 | 0.13±0.02 |
| C52:6              | 857.721 | 0.08±0.00 |
| C52:5              | 859.737 | 0.27±0.04 |
| C52:4/C53:11       | 861.752 | 1.09±0.26 |
| C52:3/C53:10       | 863.768 | 3.35±0.84 |
| C52:2/C53:9        | 865.784 | 4.47±1.05 |
| C52:1/C53:8        | 867.799 | 0.92±0.30 |
| C52:0/C53:7        | 869.815 | 0.09±0.02 |
| C53:5/C54:12       | 873.752 | 0.16±0.05 |
| C53:4/C54:11       | 875.768 | 0.09±0.02 |
| C53:3/C54:10       | 877.784 | 0.23±0.04 |
| C53:2/C54:9        | 879.705 | 0.25±0.06 |
| C53:1/C54:8        | 881.721 | 0.22±0.05 |
| C53:0/C54:7        | 883.737 | 0.11±0.02 |
| C54:6              | 885.752 | 0.48±0.05 |
| C54:5/C55:12       | 887.768 | 1.65±0.20 |
| C54:4/C55:11       | 889.784 | 3.53±0.53 |
| C54:3/C55:10       | 891.799 | 3.76±0.72 |
| C54:2/C55:9        | 893.815 | 1.35±0.34 |
| C54:1/C55:8        | 895.831 | 0.21±0.06 |
| C54:0/C55:7        | 897.846 | 0.10±0.02 |
| C55:5/C56:12       | 901.784 | 0.09±0.01 |
| C55:4/C56:11       | 903.799 | 0.17±0.02 |
| C55:3/C56:10       | 905.721 | 0.22±0.03 |
| C55:2/C56:9        | 907.737 | 0.22±0.04 |
| C55:1/C56:8        | 909.752 | 0.29±0.04 |
| C55:0/C56:7        | 911.768 | 0.80±0.06 |
| C56:6              | 913.784 | 1.06±0.05 |
| C56:5/C57:12       | 915.799 | 0.91±0.07 |
| C56:4/C57:11       | 917.815 | 0.57±0.07 |
| C56:3/C57:10       | 919.831 | 0.37±0.05 |
| C56:2/C57:9        | 921.846 | 0.22±0.05 |
| C56:1/C57:8        | 923.862 | 0.07±0.01 |
| C56:0/C57:7/C58:14 | 925.784 | 0.03±0.00 |
| C57:6/C58:13       | 927.799 | 0.06±0.01 |
| C57:5/C58:12       | 929.815 | 0.16±0.08 |
| C57:4/C58:11       | 931.737 | 0.05±0.00 |
| C57:3/C58:10       | 933.752 | 0.10±0.01 |
| C57:2/C58:9        | 935.768 | 0.20±0.04 |
| C57:1/C58:8        | 937.784 | 0.42±0.05 |
| C57:0/C58:7/C59:14 | 939.799 | 0.53±0.03 |
| C58:6/C59:13       | 941.815 | 0.38±0.01 |
| C58:5/C59:12       | 943.831 | 0.17±0.01 |
| C58:4/C59:11       | 945.846 | 0.10±0.01 |

|                    |         |            |
|--------------------|---------|------------|
| C58:3/C59:10       | 947.862 | 0.07±0.01  |
| C58:2/C59:9        | 949.878 | 0.07±0.02  |
| C58:1/C59:8/C60:15 | 951.893 | 0.11±0.07  |
| C59:5/C60:12       | 957.752 | 0.04±0.01  |
| C59:4/C60:11       | 959.768 | 0.05±0.01  |
| C59:3/C60:10       | 961.784 | 0.08±0.02  |
| C59:2/C60:9        | 963.799 | 0.09±0.02  |
| C59:1/C60:8/C61:15 | 965.815 | 0.08±0.01  |
| C59:0/C60:7/C61:14 | 967.831 | 0.07±0.02  |
| C60:6/C61:13       | 969.846 | 0.04±0.00  |
| C61:4/C62:11       | 987.799 | 0.03±0.00  |
| C61:3/C62:10       | 989.815 | 0.03±0.00  |
| Sum                |         | 35.89±5.72 |

| Fatty acyl chain composition in TAG (FA) |         |            | Acyl-CoA composition |
|------------------------------------------|---------|------------|----------------------|
| 228 (14:0)                               | 228.209 | 1.39±0.40  | 2.50±0.58            |
| 254 (16:1)                               | 254.225 | 2.13±0.51  | 7.19±0.61            |
| 256 (16:0)                               | 256.24  | 15.57±3.01 | 16.95±3.33           |
| 268 (17:1)                               | 268.24  | 2.38±0.41  |                      |
| 270 (17:0)                               | 270.256 | 1.93±0.40  |                      |
| 278 (18:3)                               | 278.225 | 1.21±0.10  | 2.98±0.41            |
| 280 (18:2)                               | 280.24  | 13.30±0.45 | 14.55±1.85           |
| 282 (18:1)                               | 282.256 | 35.25±1.89 | 30.20±4.55           |
| 284 (18:0)                               | 284.272 | 7.97±0.59  | 8.34±1.02            |
| 296 (19:1)                               | 296.272 | 0.93±0.07  |                      |
| 298 (19:0)                               | 298.287 | 0.83±0.11  |                      |
| 304 (20:4)                               | 304.24  | 2.38±0.15  | 2.97±0.72            |
| 306 (20:3)                               | 306.256 | 1.90±0.08  | 1.68±0.52            |
| 308 (20:2)                               | 308.272 | 1.43±0.15  | 2.65±0.34            |
| 310 (20:1)                               | 310.287 | 2.28±0.39  | 4.09±0.61            |
| 312 (20:0)                               | 312.303 | 1.42±0.26  | 1.64±0.46            |
| 322 (21:2)                               | 322.287 | 0.36±0.04  |                      |
| 328 (22:6)                               | 328.24  | 1.41±0.43  | 1.96±0.38            |
| 330 (22:5)                               | 330.256 | 1.10±0.27  | 1.58±0.31            |
| 332 (22:4)                               | 332.272 | 1.09±0.14  | 0.72±0.42            |
| 334 (22:3)                               | 334.287 | 0.98±0.24  |                      |
| 336 (22:2)                               | 336.303 | 0.84±0.25  |                      |
| 338 (22:1)                               | 338.318 | 0.76±0.14  |                      |
| 340 (22:0)                               | 340.334 | 0.66±0.10  |                      |
| 346 (23:4)                               | 346.287 | 0.24±0.03  |                      |
| 348 (23:3)                               | 348.303 | 0.23±0.06  |                      |
| Sum                                      |         | 100        | 100                  |

#### Liver

| Phosphatidylinositol (PI) (nmol/mg protein) |         |           |
|---------------------------------------------|---------|-----------|
| 16:0-18:2                                   | 833.518 | 0.18±0.03 |

|           |         |           |
|-----------|---------|-----------|
| 16:0-18:1 | 835.534 | 0.03±0.01 |
| 16:0-20:4 | 857.518 | 0.62±0.08 |
| 18:1-18:2 | 859.534 | 0.19±0.03 |
| 18:0-18:2 | 861.549 | 0.19±0.02 |
| 18:2-20:4 | 881.518 | 0.04±0.00 |
| 16:0-22:6 | 881.518 | 0.02±0.00 |
| 18:1-20:4 | 883.534 | 0.48±0.07 |
| 18:0-20:4 | 885.549 | 4.79±0.48 |
| 18:0-20:3 | 887.565 | 0.27±0.04 |
| 18:1-22:6 | 907.534 | 0.01±0.00 |
| 18:0-22:6 | 909.549 | 0.06±0.00 |
| 18:0-22:5 | 911.565 | 0.03±0.00 |
| 18:0-22:4 | 913.581 | 0.02±0.00 |
| Sum       |         | 6.92±0.73 |

---

**Phosphatidic acid (PA) (pmol/mg protein)**

---

|           |         |            |
|-----------|---------|------------|
| 16:0-18:2 | 671.466 | 90.0±201   |
| 16:0-18:1 | 673.482 | 35.2±7.0   |
| 18:0-18:2 | 699.497 | 20.9±6.4   |
| 18:1-18:1 | 699.497 | 20.9±6.3   |
| 18:0-18:1 | 701.513 | 3.1±1.9    |
| 18:0-20:2 | 727.529 | 1.5±1.5    |
| Sum       |         | 172.1±41.6 |

---

**Triacylglycerol (TAG) (nmol/mg protein)**

---

|              |         |            |
|--------------|---------|------------|
| C48:3        | 807.705 | 1.82±0.31  |
| C48:2/C49:9  | 809.721 | 3.77±0.64  |
| C48:1/C49:8  | 811.737 | 2.53±0.40  |
| C48:0/C49:7  | 813.752 | 0.39±0.02  |
| C50:5        | 831.705 | 1.12±0.20  |
| C50:4        | 833.721 | 6.03±0.86  |
| C50:3/C51:10 | 835.737 | 20.76±2.59 |
| C50:2/C51:9  | 837.752 | 25.25±3.02 |
| C50:1/C51:8  | 839.768 | 9.65±1.02  |
| C51:3/C52:10 | 849.752 | 1.04±0.15  |
| C51:2/C52:9  | 851.768 | 2.93±0.44  |
| C51:1/C52:8  | 853.690 | 1.54±0.25  |
| C51:0/C52:7  | 855.705 | 1.17±0.19  |
| C52:6        | 857.721 | 3.67±0.37  |
| C52:5        | 859.737 | 16.11±1.22 |
| C52:4/C53:11 | 861.752 | 51.46±1.58 |
| C52:3/C53:10 | 863.768 | 85.28±3.30 |
| C52:2/C53:9  | 865.784 | 49.79±2.05 |
| C52:1/C53:8  | 867.799 | 5.31±0.27  |
| C53:4/C54:11 | 875.768 | 2.07±0.26  |
| C53:3/C54:10 | 877.784 | 5.04±0.49  |
| C53:2/C54:9  | 879.705 | 4.46±0.55  |
| C53:1/C54:8  | 881.721 | 3.66±0.41  |
| C53:0/C54:7  | 883.737 | 5.89±0.30  |
| C54:6        | 885.752 | 14.04±0.61 |
| C54:5/C55:12 | 887.768 | 23.55±1.48 |

|                    |         |              |
|--------------------|---------|--------------|
| C54:4/C55:11       | 889.784 | 29.19±3.02   |
| C54:3/C55:10       | 891.799 | 18.18±2.07   |
| C54:2/C55:9        | 893.815 | 4.38±0.31    |
| C55:4/C56:11       | 903.799 | 1.79±0.28    |
| C55:3/C56:10       | 905.721 | 1.68±0.23    |
| C55:2/C56:9        | 907.737 | 2.85±0.11    |
| C55:1/C56:8        | 909.752 | 7.52±0.26    |
| C55:0/C56:7        | 911.768 | 9.29±0.24    |
| C56:6              | 913.784 | 5.36±0.21    |
| C56:5/C57:12       | 915.799 | 3.07±0.22    |
| C56:4/C57:11       | 917.815 | 2.02±0.17    |
| C56:3/C57:10       | 919.831 | 1.30±0.18    |
| C57:3/C58:10       | 933.752 | 1.17±0.02    |
| C57:2/C58:9        | 935.768 | 2.33±0.04    |
| C57:1/C58:8        | 937.784 | 2.04±0.13    |
| C57:0/C58:7/C59:14 | 939.799 | 1.29±0.05    |
| C58:6/C59:13       | 941.815 | 0.77±0.10    |
| Sum                |         | 442.65±28.31 |

| Fatty acyl chain composition in TAG (FA) |         |            | Acyl-CoA composition |
|------------------------------------------|---------|------------|----------------------|
| 226(14:1)                                | 226.193 | 0.28±0.05  |                      |
| 228(14:0)                                | 228.209 | 0.94±0.08  | 1.31±0.21            |
| 252(16:2)                                | 252.209 | 0.38±0.05  | 0.30±0.12            |
| 254(16:1)                                | 254.225 | 7.42±0.91  | 9.03±1.26            |
| 256(16:0)                                | 256.240 | 23.48±0.82 | 23.56±3.45           |
| 278(18:3)                                | 278.225 | 2.77±0.20  | 2.55±0.43            |
| 280(18:2)                                | 280.240 | 19.61±1.06 | 16.08±3.16           |
| 282(18:1)                                | 282.256 | 29.98±0.97 | 28.01±4.27           |
| 284(18:0)                                | 284.272 | 5.38±0.09  | 6.81±1.54            |
| 304(20:4)                                | 304.240 | 1.66±0.06  | 2.96±0.88            |
| 306(20:3)                                | 306.256 | 0.69±0.05  | 0.81±0.15            |
| 308(20:2)                                | 308.272 | 0.69±0.07  | 1.21±0.32            |
| 310(20:1)                                | 310.287 | 1.30±0.04  | 2.15±0.41            |
| 312(20:0)                                | 312.303 | 0.74±0.08  | 1.05±0.27            |
| 326(21:0)                                | 326.225 | 0.21±0.02  |                      |
| 328(22:6)                                | 328.240 | 1.61±0.16  | 2.11±0.36            |
| 330(22:5)                                | 330.256 | 0.59±0.05  | 0.84±0.22            |
| 332(22:4)                                | 332.272 | 0.34±0.04  | 0.24±0.16            |
| 334(22:3)                                | 334.287 | 0.94±0.09  | 0.98±0.32            |
| 336(22:2)                                | 336.303 | 0.39±0.03  |                      |
| 338(22:1)                                | 338.318 | 0.29±0.05  |                      |
| 340(22:0)                                | 340.334 | 0.30±0.05  |                      |
| Sum                                      |         | 100        | 100                  |

#### Skeletal Muscle

| Phosphatidylinositol (PI) (nmol/mg protein) |         |           |
|---------------------------------------------|---------|-----------|
| 16:0-16:0                                   | 809.518 | 0.05±0.00 |
| 16:0-18:2                                   | 833.518 | 0.08±0.00 |

|           |         |           |
|-----------|---------|-----------|
| 16:0-18:1 | 835.534 | 0.11±0.01 |
| 16:0-18:0 | 837.549 | 0.06±0.01 |
| 16:0-20:4 | 857.518 | 0.11±0.01 |
| 18:1-18:2 | 859.534 | 0.04±0.01 |
| 18:0-18:2 | 861.549 | 0.16±0.01 |
| 18:0-18:1 | 863.565 | 0.02±0.00 |
| 18:2-20:4 | 881.518 | 0.06±0.00 |
| 16:0-22:6 | 881.518 | 0.03±0.00 |
| 18:1-20:4 | 883.534 | 0.19±0.01 |
| 18:0-20:4 | 885.549 | 2.49±0.06 |
| 18:0-20:3 | 887.565 | 0.25±0.06 |
| 18:0-20:2 | 889.581 | 0.03±0.01 |
| 18:0-20:0 | 893.612 | 0.01±0.00 |
| 18:1-22:6 | 907.534 | 0.06±0.00 |
| 18:0-22:6 | 909.549 | 0.88±0.02 |
| 18:0-22:5 | 911.565 | 0.21±0.01 |
| 18:0-22:4 | 913.581 | 0.02±0.01 |
| Sum       |         | 4.84±0.12 |

---

**Phosphatidic acid (PA) (pmol/mg protein)**

---

|           |         |          |
|-----------|---------|----------|
| 16:1-16:1 | 643.434 | 8.8±1.3  |
| 16:0-16:0 | 647.466 | 27.1±1.9 |
| 16:0-18:2 | 671.466 | 4.5±1.3  |
| 16:0-18:1 | 673.481 | 19.6±1.8 |
| 18:0-18:2 | 699.497 | 3.9±0.4  |
| 18:1-18:1 | 699.497 | 3.9±0.3  |
| 18:0-18:1 | 701.513 | 12.9±0.7 |
| 18:0-20:4 | 723.497 | 5.3±3.0  |
| 18:0-20:2 | 727.528 | 3.1±0.6  |
| Sum       |         | 89.1±1.4 |

---

**Triacylglycerol (TAG) (nmol/mg protein)**

---

|              |         |           |
|--------------|---------|-----------|
| C46:1/C47:8  | 783.705 | 0.23±0.04 |
| C46:0/C47:7  | 785.721 | 0.12±0.01 |
| C48:2/C49:9  | 809.721 | 1.20±0.36 |
| C48:1/C49:8  | 811.737 | 1.04±0.24 |
| C48:0/C49:7  | 813.752 | 0.41±0.04 |
| C50:4        | 833.721 | 1.24±0.49 |
| C50:3/C51:10 | 835.737 | 3.64±1.35 |
| C50:2/C51:9  | 837.752 | 4.21±1.24 |
| C50:1/C51:8  | 839.768 | 1.94±0.38 |
| C50:0/C51:7  | 841.784 | 0.20±0.01 |
| C51:3/C52:10 | 849.752 | 0.21±0.07 |
| C51:2/C52:9  | 851.768 | 0.41±0.14 |
| C51:1/C52:8  | 853.690 | 0.46±0.06 |
| C51:0/C52:7  | 855.705 | 0.34±0.05 |
| C52:6        | 857.721 | 0.43±0.10 |
| C52:5        | 859.737 | 2.03±0.73 |
| C52:4/C53:11 | 861.752 | 5.87±1.25 |
| C52:3/C53:10 | 863.768 | 7.93±2.73 |
| C52:2/C53:9  | 865.784 | 4.33±1.16 |

|                    |         |            |
|--------------------|---------|------------|
| C52:1/C53:8        | 867.799 | 0.59±0.11  |
| C53:3/C54:10       | 877.784 | 0.59±0.21  |
| C53:2/C54:9        | 879.705 | 0.47±0.14  |
| C53:1/C54:8        | 881.721 | 0.35±0.09  |
| C53:0/C54:7        | 883.737 | 0.49±0.17  |
| C54:6              | 885.752 | 1.53±0.60  |
| C54:5/C55:12       | 887.768 | 3.89±1.56  |
| C54:4/C55:11       | 889.784 | 5.65±2.08  |
| C54:3/C55:10       | 891.799 | 3.81±1.20  |
| C54:2/C55:9        | 893.815 | 0.71±0.19  |
| C55:3/C56:10       | 905.721 | 0.33±0.11  |
| C55:2/C56:9        | 907.737 | 0.33±0.10  |
| C55:1/C56:8        | 909.752 | 0.46±0.15  |
| C55:0/C56:7        | 911.768 | 0.54±0.16  |
| C56:6              | 913.784 | 0.40±0.12  |
| C56:5/C57:12       | 915.799 | 0.29±0.06  |
| C57:5/C58:12       | 929.815 | 0.15±0.04  |
| C57:4/C58:11       | 931.737 | 0.04±0.01  |
| C57:3/C58:10       | 933.752 | 0.13±0.02  |
| C57:2/C58:9        | 935.768 | 0.21±0.07  |
| C57:1/C58:8        | 937.784 | 0.23±0.07  |
| C57:0/C58:7/C59:14 | 939.799 | 0.12±0.03  |
| C58:6/C59:13       | 941.815 | 0.05±0.01  |
| C58:5/C59:12       | 943.831 | 0.04±0.00  |
| C58:4/C59:11       | 945.846 | 0.04±0.01  |
| C58:3/C59:10       | 947.862 | 0.03±0.01  |
| C58:2/C59:9        | 949.878 | 0.05±0.01  |
| C58:1/C59:8/C60:15 | 951.893 | 0.07±0.01  |
| Sum                |         | 57.83±8.74 |

| Fatty acyl chain composition in TAG (FA) |         |            | Acyl-CoA composition |
|------------------------------------------|---------|------------|----------------------|
| 226 (14:1)                               | 226.193 | 0.31±0.15  |                      |
| 228 (14:0)                               | 228.209 | 1.77±0.43  | 2.40±0.70            |
| 252 (16:2)                               | 252.209 | 0.24±0.08  |                      |
| 254 (16:1)                               | 254.225 | 11.83±0.82 | 12.07±2.01           |
| 256 (16:0)                               | 256.240 | 18.45±2.43 | 18.78±3.26           |
| 278 (18:3)                               | 278.225 | 2.34±0.57  | 3.55±0.82            |
| 280 (18:2)                               | 280.240 | 18.09±3.61 | 16.95±3.47           |
| 282 (18:1)                               | 282.256 | 33.70±1.32 | 31.14±5.32           |
| 284 (18:0)                               | 284.272 | 5.80±0.78  | 7.22±1.58            |
| 304 (20:4)                               | 304.240 | 1.59±0.52  | 2.34±0.61            |
| 306 (20:3)                               | 306.256 | 0.73±0.18  | 1.08±0.31            |
| 308 (20:2)                               | 308.272 | 0.55±0.09  | 0.61±0.22            |
| 310 (20:1)                               | 310.287 | 0.80±0.23  | 1.21±0.26            |
| 312 (20:0)                               | 312.303 | 0.49±0.15  | 0.49±0.16            |
| 326 (21:0)                               | 326.225 | 0.18±0.12  |                      |
| 328 (22:6)                               | 328.240 | 0.79±0.09  | 0.98±0.28            |

|            |         |           |           |
|------------|---------|-----------|-----------|
| 330 (22:5) | 330.256 | 0.40±0.06 | 0.43±0.12 |
| 332 (22:4) | 332.272 | 0.29±0.12 |           |
| 334 (22:3) | 334.287 | 0.67±0.13 | 0.75±0.19 |
| 336 (22:2) | 336.303 | 0.39±0.18 |           |
| 338 (22:1) | 338.318 | 0.22±0.09 |           |
| 340 (22:0) | 340.334 | 0.37±0.14 |           |
| Sum        |         | 100       | 100       |

---
