# Supplementary material
Source: PubMed Central journal article supplement (PMC3605979)
Supplement: supp_M033837_jlr.M033837-2.pdf [file supp_M033837_jlr.M033837-2.pdf]

## Simulation of triacylglycerol ion profiles: Bioinformatics for interpretation of triacylglycerol biosyntheses

Rowland H. Han, Miao Wang, Xiaoling Fang, and Xianlin Han  
Diabetes and Obesity Research Center  
Sanford-Burnham Medical Research Institute  
Orlando, FL 32827

**Table S2.** Mass levels of individual fatty acyl chains of TAG ions determined by neutral loss scanning of all potentially occurring fatty acids

| TAG          | [TAG+Li] <sup>+</sup> | 226(14:1) | 228(14:0) | 252(16:2) | 254(16:1) | 256(16:0) | 278(18:3) | 280(18:2) | 282(18:1) |
|--------------|-----------------------|-----------|-----------|-----------|-----------|-----------|-----------|-----------|-----------|
| C48:3        | 807.705               | 0.07±0.01 | 0.06±0.01 | 0.01±0.00 | 0.11±0.03 | 0.07±0.02 | 0.00±0.00 | 0.07±0.02 | 0.02±0.01 |
| C48:2/C49:9  | 809.721               | 0.04±0.01 | 0.16±0.02 | 0.00±0.00 | 0.22±0.05 | 0.28±0.05 | 0.00±0.00 | 0.07±0.01 | 0.07±0.02 |
| C48:1/C49:8  | 811.737               | 0.00±0.00 | 0.10±0.01 | 0.00±0.00 | 0.08±0.01 | 0.32±0.08 | 0.00±0.00 | 0.00±0.00 | 0.05±0.01 |
| C48:0/C49:7  | 813.752               | 0.00±0.00 | 0.00±0.00 | 0.00±0.00 | 0.00±0.00 | 0.07±0.00 | 0.00±0.00 | 0.00±0.00 | 0.00±0.00 |
| C50:5        | 831.705               | 0.02±0.01 | 0.02±0.00 | 0.02±0.01 | 0.06±0.01 | 0.05±0.01 | 0.03±0.01 | 0.05±0.01 | 0.00±0.00 |
| C50:4        | 833.721               | 0.04±0.01 | 0.09±0.01 | 0.09±0.01 | 0.47±0.10 | 0.18±0.02 | 0.09±0.02 | 0.29±0.02 | 0.06±0.02 |
| C50:3/C51:10 | 835.737               | 0.02±0.00 | 0.20±0.01 | 0.05±0.01 | 1.55±0.21 | 1.40±0.15 | 0.04±0.01 | 0.96±0.09 | 0.43±0.06 |
| C50:2/C51:9  | 837.752               | 0.00±0.00 | 0.12±0.02 | 0.00±0.00 | 1.05±0.12 | 2.81±0.29 | 0.00±0.00 | 0.47±0.03 | 1.17±0.13 |
| C50:1/C51:8  | 839.768               | 0.00±0.00 | 0.01±0.00 | 0.00±0.00 | 0.02±0.00 | 1.45±0.12 | 0.00±0.00 | 0.00±0.00 | 0.53±0.03 |
| C51:3/C52:10 | 849.752               | 0.00±0.00 | 0.01±0.00 | 0.01±0.00 | 0.06±0.01 | 0.05±0.01 | 0.01±0.00 | 0.07±0.01 | 0.03±0.01 |
| C51:2/C52:9  | 851.768               | 0.00±0.00 | 0.02±0.00 | 0.01±0.00 | 0.11±0.03 | 0.18±0.03 | 0.04±0.01 | 0.06±0.02 | 0.09±0.01 |
| C51:1/C52:8  | 853.690               | 0.00±0.00 | 0.01±0.00 | 0.00±0.00 | 0.03±0.01 | 0.11±0.03 | 0.11±0.01 | 0.01±0.01 | 0.04±0.01 |
| C51:0/C52:7  | 855.705               | 0.01±0.00 | 0.01±0.00 | 0.01±0.00 | 0.02±0.00 | 0.05±0.01 | 0.04±0.01 | 0.07±0.01 | 0.02±0.01 |
| C52:6        | 857.721               | 0.00±0.00 | 0.02±0.00 | 0.03±0.00 | 0.14±0.01 | 0.10±0.01 | 0.13±0.02 | 0.15±0.01 | 0.10±0.01 |
| C52:5        | 859.737               | 0.00±0.00 | 0.01±0.00 | 0.06±0.01 | 0.60±0.02 | 0.57±0.02 | 0.63±0.03 | 1.11±0.02 | 0.23±0.03 |
| C52:4/C53:11 | 861.752               | 0.00±0.00 | 0.01±0.00 | 0.04±0.01 | 1.36±0.14 | 2.96±0.45 | 0.43±0.03 | 4.88±0.71 | 1.73±0.18 |
| C52:3/C53:10 | 863.768               | 0.00±0.00 | 0.00±0.00 | 0.00±0.00 | 0.87±0.12 | 6.35±0.59 | 0.00±0.00 | 4.46±0.47 | 7.48±0.21 |
| C52:2/C53:9  | 865.784               | 0.00±0.00 | 0.00±0.00 | 0.00±0.00 | 0.04±0.01 | 3.79±0.18 | 0.00±0.00 | 0.11±0.02 | 6.14±0.29 |
| C52:1/C53:8  | 867.799               | 0.00±0.00 | 0.00±0.00 | 0.00±0.00 | 0.00±0.00 | 0.14±0.03 | 0.00±0.00 | 0.00±0.00 | 0.10±0.03 |
| C53:4/C54:11 | 875.768               | 0.00±0.00 | 0.00±0.00 | 0.00±0.00 | 0.05±0.01 | 0.05±0.01 | 0.05±0.01 | 0.13±0.02 | 0.06±0.01 |
| C53:3/C54:10 | 877.784               | 0.00±0.00 | 0.00±0.00 | 0.00±0.00 | 0.10±0.02 | 0.26±0.02 | 0.08±0.01 | 0.33±0.03 | 0.23±0.03 |
| C53:2/C54:9  | 879.705               | 0.00±0.00 | 0.00±0.00 | 0.00±0.00 | 0.04±0.01 | 0.26±0.03 | 0.10±0.01 | 0.15±0.02 | 0.30±0.04 |
| C53:1/C54:8  | 881.721               | 0.00±0.00 | 0.01±0.00 | 0.01±0.00 | 0.05±0.00 | 0.14±0.02 | 0.09±0.01 | 0.05±0.01 | 0.21±0.03 |
| C53:0/C54:7  | 883.737               | 0.00±0.00 | 0.01±0.00 | 0.00±0.00 | 0.12±0.01 | 0.18±0.03 | 0.16±0.01 | 0.28±0.03 | 0.09±0.02 |
| C54:6        | 885.752               | 0.00±0.00 | 0.00±0.00 | 0.00±0.00 | 0.07±0.01 | 0.42±0.04 | 0.35±0.01 | 0.98±0.07 | 0.44±0.03 |
| C54:5/C55:12 | 887.768               | 0.00±0.00 | 0.00±0.00 | 0.00±0.00 | 0.03±0.00 | 0.29±0.03 | 0.22±0.02 | 2.18±0.01 | 1.79±0.05 |
| C54:4/C55:11 | 889.784               | 0.00±0.00 | 0.00±0.00 | 0.00±0.00 | 0.03±0.01 | 0.12±0.01 | 0.01±0.00 | 1.67±0.13 | 4.18±0.48 |
| C54:3/C55:10 | 891.799               | 0.00±0.00 | 0.00±0.00 | 0.00±0.00 | 0.03±0.01 | 0.11±0.01 | 0.00±0.00 | 0.15±0.02 | 2.93±0.39 |
| C54:2/C55:9  | 893.815               | 0.00±0.00 | 0.00±0.00 | 0.00±0.00 | 0.01±0.01 | 0.10±0.02 | 0.00±0.00 | 0.00±0.00 | 0.23±0.03 |
| C55:4/C56:11 | 903.799               | 0.00±0.00 | 0.00±0.00 | 0.00±0.00 | 0.00±0.00 | 0.00±0.01 | 0.01±0.01 | 0.14±0.03 | 0.15±0.02 |
| C55:3/C56:10 | 905.721               | 0.00±0.00 | 0.00±0.00 | 0.00±0.00 | 0.01±0.00 | 0.00±0.00 | 0.01±0.00 | 0.06±0.01 | 0.17±0.04 |
| C55:2/C56:9  | 907.737               | 0.00±0.00 | 0.00±0.00 | 0.00±0.00 | 0.06±0.01 | 0.05±0.02 | 0.03±0.00 | 0.08±0.02 | 0.11±0.02 |
| C55:1/C56:8  | 909.752               | 0.00±0.00 | 0.00±0.00 | 0.00±0.00 | 0.06±0.01 | 0.35±0.10 | 0.02±0.00 | 0.27±0.04 | 0.14±0.02 |
| C55:0/C56:7  | 911.768               | 0.00±0.00 | 0.00±0.00 | 0.00±0.00 | 0.02±0.00 | 0.37±0.05 | 0.01±0.00 | 0.17±0.01 | 0.40±0.04 |
| C56:6        | 913.784               | 0.00±0.00 | 0.00±0.00 | 0.00±0.00 | 0.01±0.00 | 0.13±0.02 | 0.01±0.00 | 0.09±0.01 | 0.26±0.02 |
| C56:5/C57:12 | 915.799               | 0.00±0.00 | 0.00±0.00 | 0.00±0.00 | 0.00±0.00 | 0.03±0.01 | 0.01±0.00 | 0.06±0.00 | 0.13±0.02 |
| C56:4/C57:11 | 917.815               | 0.00±0.00 | 0.00±0.00 | 0.00±0.00 | 0.00±0.00 | 0.00±0.00 | 0.00±0.00 | 0.05±0.01 | 0.12±0.02 |
| C56:3/C57:10 | 919.831               | 0.00±0.00 | 0.00±0.00 | 0.00±0.00 | 0.00±0.00 | 0.00±0.00 | 0.00±0.00 | 0.00±0.01 | 0.11±0.03 |
| C57:3/C58:10 | 933.752               | 0.00±0.00 | 0.00±0.00 | 0.00±0.00 | 0.00±0.00 | 0.00±0.00 | 0.01±0.00 | 0.06±0.01 | 0.01±0.01 |
| C57:2/C58:9  | 935.768               | 0.00±0.00 | 0.00±0.00 | 0.00±0.00 | 0.00±0.00 | 0.00±0.00 | 0.00±0.00 | 0.07±0.01 | 0.13±0.02 |

|                    |         |           |           |           |           |            |           |            |            |
|--------------------|---------|-----------|-----------|-----------|-----------|------------|-----------|------------|------------|
| C57:1/C58:8        | 937.784 | 0.00±0.00 | 0.00±0.00 | 0.00±0.00 | 0.00±0.00 | 0.00±0.00  | 0.00±0.00 | 0.03±0.00  | 0.13±0.01  |
| C57:0/C58:7/C59:14 | 939.799 | 0.00±0.00 | 0.00±0.00 | 0.00±0.00 | 0.01±0.01 | 0.03±0.03  | 0.00±0.00 | 0.02±0.01  | 0.05±0.01  |
| C58:6/C59:13       | 941.815 | 0.00±0.00 | 0.00±0.00 | 0.00±0.00 | 0.00±0.00 | 0.04±0.03  | 0.00±0.00 | 0.00±0.00  | 0.04±0.03  |
| <b>Total FA</b>    |         | 0.22±0.05 | 0.87±0.11 | 0.36±0.07 | 7.47±1.04 | 23.89±2.61 | 2.72±0.25 | 19.88±1.99 | 30.69±2.47 |

**Continued**

| TAG                | [TAG+Li] <sup>+</sup> | 284(18:0) | 304(20:4) | 306(20:3) | 308(20:2) | 310(20:1) | 312(20:0) | 326(21:0) | 328(22:6) |
|--------------------|-----------------------|-----------|-----------|-----------|-----------|-----------|-----------|-----------|-----------|
| C48:3              | 807.705               | 0.00±0.00 | 0.00±0.00 | 0.00±0.00 | 0.00±0.00 | 0.00±0.00 | 0.00±0.00 | 0.00±0.00 | 0.00±0.00 |
| C48:2/C49:9        | 809.721               | 0.00±0.00 | 0.00±0.00 | 0.00±0.00 | 0.00±0.00 | 0.00±0.00 | 0.00±0.00 | 0.00±0.00 | 0.00±0.00 |
| C48:1/C49:8        | 811.737               | 0.00±0.00 | 0.00±0.00 | 0.00±0.00 | 0.00±0.00 | 0.00±0.00 | 0.00±0.00 | 0.00±0.00 | 0.00±0.00 |
| C48:0/C49:7        | 813.752               | 0.00±0.00 | 0.00±0.00 | 0.00±0.00 | 0.00±0.00 | 0.00±0.00 | 0.00±0.00 | 0.00±0.00 | 0.00±0.00 |
| C50:5              | 831.705               | 0.01±0.00 | 0.00±0.00 | 0.00±0.00 | 0.00±0.00 | 0.00±0.00 | 0.00±0.00 | 0.00±0.00 | 0.00±0.00 |
| C50:4              | 833.721               | 0.05±0.01 | 0.00±0.00 | 0.00±0.00 | 0.00±0.00 | 0.00±0.00 | 0.00±0.00 | 0.00±0.00 | 0.00±0.00 |
| C50:3/C51:10       | 835.737               | 0.02±0.00 | 0.00±0.00 | 0.00±0.00 | 0.00±0.00 | 0.00±0.00 | 0.00±0.00 | 0.00±0.00 | 0.00±0.00 |
| C50:2/C51:9        | 837.752               | 0.05±0.01 | 0.00±0.00 | 0.00±0.00 | 0.00±0.00 | 0.00±0.00 | 0.00±0.00 | 0.00±0.00 | 0.00±0.00 |
| C50:1/C51:8        | 839.768               | 0.17±0.03 | 0.00±0.00 | 0.00±0.00 | 0.00±0.00 | 0.00±0.00 | 0.00±0.00 | 0.00±0.00 | 0.00±0.00 |
| C51:3/C52:10       | 849.752               | 0.00±0.00 | 0.00±0.00 | 0.00±0.00 | 0.00±0.00 | 0.00±0.00 | 0.00±0.00 | 0.00±0.00 | 0.00±0.00 |
| C51:2/C52:9        | 851.768               | 0.00±0.00 | 0.01±0.00 | 0.00±0.00 | 0.00±0.00 | 0.00±0.00 | 0.00±0.00 | 0.00±0.00 | 0.00±0.00 |
| C51:1/C52:8        | 853.690               | 0.00±0.00 | 0.02±0.01 | 0.00±0.00 | 0.00±0.00 | 0.00±0.00 | 0.00±0.00 | 0.00±0.00 | 0.00±0.00 |
| C51:0/C52:7        | 855.705               | 0.01±0.00 | 0.01±0.00 | 0.01±0.00 | 0.00±0.00 | 0.00±0.00 | 0.00±0.00 | 0.00±0.00 | 0.01±0.00 |
| C52:6              | 857.721               | 0.08±0.01 | 0.02±0.00 | 0.00±0.00 | 0.01±0.00 | 0.01±0.00 | 0.00±0.00 | 0.00±0.00 | 0.01±0.00 |
| C52:5              | 859.737               | 0.36±0.01 | 0.04±0.00 | 0.01±0.00 | 0.01±0.00 | 0.03±0.00 | 0.01±0.00 | 0.00±0.00 | 0.00±0.00 |
| C52:4/C53:11       | 861.752               | 0.28±0.01 | 0.02±0.00 | 0.02±0.00 | 0.00±0.00 | 0.01±0.00 | 0.02±0.00 | 0.00±0.00 | 0.00±0.00 |
| C52:3/C53:10       | 863.768               | 0.24±0.03 | 0.00±0.00 | 0.01±0.00 | 0.01±0.00 | 0.01±0.00 | 0.01±0.00 | 0.00±0.00 | 0.00±0.00 |
| C52:2/C53:9        | 865.784               | 1.00±0.05 | 0.00±0.00 | 0.00±0.00 | 0.00±0.00 | 0.02±0.00 | 0.00±0.00 | 0.00±0.00 | 0.00±0.00 |
| C52:1/C53:8        | 867.799               | 0.88±0.03 | 0.00±0.00 | 0.00±0.00 | 0.00±0.00 | 0.01±0.00 | 0.01±0.00 | 0.00±0.00 | 0.00±0.00 |
| C53:4/C54:11       | 875.768               | 0.00±0.00 | 0.00±0.00 | 0.00±0.00 | 0.00±0.00 | 0.00±0.00 | 0.00±0.00 | 0.00±0.00 | 0.00±0.00 |
| C53:3/C54:10       | 877.784               | 0.00±0.00 | 0.05±0.01 | 0.00±0.00 | 0.00±0.00 | 0.00±0.00 | 0.00±0.00 | 0.00±0.00 | 0.00±0.00 |
| C53:2/C54:9        | 879.705               | 0.02±0.00 | 0.12±0.01 | 0.01±0.00 | 0.00±0.00 | 0.00±0.00 | 0.00±0.00 | 0.00±0.00 | 0.00±0.00 |
| C53:1/C54:8        | 881.721               | 0.06±0.01 | 0.11±0.01 | 0.03±0.00 | 0.02±0.00 | 0.00±0.00 | 0.00±0.00 | 0.00±0.00 | 0.02±0.00 |
| C53:0/C54:7        | 883.737               | 0.11±0.01 | 0.06±0.00 | 0.03±0.00 | 0.09±0.01 | 0.04±0.00 | 0.00±0.00 | 0.00±0.00 | 0.09±0.01 |
| C54:6              | 885.752               | 0.19±0.01 | 0.30±0.04 | 0.03±0.00 | 0.07±0.01 | 0.18±0.02 | 0.02±0.00 | 0.00±0.00 | 0.05±0.01 |
| C54:5/C55:12       | 887.768               | 0.18±0.02 | 0.22±0.02 | 0.15±0.02 | 0.02±0.00 | 0.15±0.00 | 0.08±0.01 | 0.00±0.00 | 0.00±0.00 |
| C54:4/C55:11       | 889.784               | 0.27±0.00 | 0.01±0.00 | 0.10±0.01 | 0.08±0.00 | 0.05±0.01 | 0.07±0.01 | 0.00±0.00 | 0.00±0.00 |
| C54:3/C55:10       | 891.799               | 0.62±0.05 | 0.00±0.00 | 0.00±0.00 | 0.07±0.01 | 0.15±0.01 | 0.02±0.01 | 0.00±0.00 | 0.00±0.00 |
| C54:2/C55:9        | 893.815               | 0.46±0.05 | 0.00±0.00 | 0.00±0.00 | 0.00±0.00 | 0.11±0.02 | 0.07±0.01 | 0.00±0.00 | 0.00±0.00 |
| C55:4/C56:11       | 903.799               | 0.00±0.00 | 0.05±0.01 | 0.01±0.00 | 0.00±0.00 | 0.00±0.00 | 0.00±0.00 | 0.01±0.00 | 0.01±0.00 |
| C55:3/C56:10       | 905.721               | 0.01±0.00 | 0.06±0.01 | 0.01±0.00 | 0.01±0.00 | 0.00±0.00 | 0.00±0.00 | 0.00±0.00 | 0.01±0.00 |
| C55:2/C56:9        | 907.737               | 0.04±0.01 | 0.06±0.01 | 0.02±0.00 | 0.02±0.01 | 0.01±0.00 | 0.01±0.00 | 0.01±0.01 | 0.09±0.01 |
| C55:1/C56:8        | 909.752               | 0.02±0.01 | 0.07±0.00 | 0.02±0.00 | 0.04±0.00 | 0.04±0.00 | 0.01±0.00 | 0.01±0.00 | 0.39±0.08 |
| C55:0/C56:7        | 911.768               | 0.02±0.00 | 0.16±0.01 | 0.04±0.00 | 0.03±0.00 | 0.09±0.00 | 0.02±0.00 | 0.00±0.00 | 0.33±0.04 |
| C56:6              | 913.784               | 0.06±0.01 | 0.11±0.01 | 0.08±0.01 | 0.03±0.00 | 0.07±0.00 | 0.05±0.00 | 0.00±0.00 | 0.01±0.00 |
| C56:5/C57:12       | 915.799               | 0.07±0.01 | 0.03±0.01 | 0.06±0.01 | 0.05±0.01 | 0.07±0.01 | 0.04±0.01 | 0.00±0.00 | 0.00±0.00 |
| C56:4/C57:11       | 917.815               | 0.02±0.01 | 0.00±0.00 | 0.01±0.00 | 0.04±0.01 | 0.11±0.01 | 0.03±0.00 | 0.00±0.00 | 0.00±0.00 |
| C56:3/C57:10       | 919.831               | 0.01±0.00 | 0.00±0.00 | 0.00±0.00 | 0.01±0.01 | 0.07±0.01 | 0.05±0.02 | 0.00±0.00 | 0.00±0.00 |
| C57:3/C58:10       | 933.752               | 0.00±0.00 | 0.02±0.00 | 0.00±0.00 | 0.00±0.00 | 0.01±0.00 | 0.00±0.00 | 0.01±0.00 | 0.07±0.01 |
| C57:2/C58:9        | 935.768               | 0.00±0.00 | 0.01±0.00 | 0.01±0.00 | 0.00±0.00 | 0.01±0.00 | 0.01±0.00 | 0.00±0.00 | 0.15±0.01 |
| C57:1/C58:8        | 937.784               | 0.02±0.00 | 0.01±0.00 | 0.01±0.00 | 0.01±0.00 | 0.01±0.00 | 0.01±0.00 | 0.00±0.00 | 0.09±0.01 |
| C57:0/C58:7/C59:14 | 939.799               | 0.02±0.00 | 0.00±0.00 | 0.00±0.00 | 0.01±0.00 | 0.01±0.00 | 0.02±0.00 | 0.00±0.00 | 0.01±0.00 |
| C58:6/C59:13       | 941.815               | 0.01±0.01 | 0.00±0.00 | 0.00±0.00 | 0.00±0.00 | 0.01±0.00 | 0.01±0.00 | 0.00±0.00 | 0.00±0.00 |
| <b>Total FA</b>    |                       | 5.39±0.42 | 1.60±0.20 | 0.67±0.10 | 0.66±0.11 | 1.29±0.14 | 0.57±0.11 | 0.08±0.04 | 1.37±0.21 |

## Continued

| TAG                | [TAG+Li] <sup>+</sup> | 330(22:5)        | 332(22:4)        | 334(22:3)        | 336(22:2)        | 338(22:1)        | 340(22:0)        |
|--------------------|-----------------------|------------------|------------------|------------------|------------------|------------------|------------------|
| C48:3              | 807.705               | 0.00±0.00        | 0.00±0.00        | 0.00±0.00        | 0.00±0.00        | 0.00±0.00        | 0.00±0.00        |
| C48:2/C49:9        | 809.721               | 0.00±0.00        | 0.00±0.00        | 0.00±0.00        | 0.00±0.00        | 0.00±0.00        | 0.00±0.00        |
| C48:1/C49:8        | 811.737               | 0.00±0.00        | 0.00±0.00        | 0.00±0.00        | 0.00±0.00        | 0.00±0.00        | 0.00±0.00        |
| C48:0/C49:7        | 813.752               | 0.00±0.00        | 0.00±0.00        | 0.00±0.00        | 0.00±0.00        | 0.00±0.00        | 0.01±0.00        |
| C50:5              | 831.705               | 0.00±0.00        | 0.00±0.00        | 0.00±0.00        | 0.00±0.00        | 0.00±0.00        | 0.00±0.00        |
| C50:4              | 833.721               | 0.00±0.00        | 0.00±0.00        | 0.00±0.00        | 0.00±0.00        | 0.00±0.00        | 0.00±0.00        |
| C50:3/C51:10       | 835.737               | 0.00±0.00        | 0.00±0.00        | 0.00±0.00        | 0.00±0.00        | 0.00±0.00        | 0.00±0.00        |
| C50:2/C51:9        | 837.752               | 0.00±0.00        | 0.00±0.00        | 0.00±0.00        | 0.00±0.00        | 0.00±0.00        | 0.00±0.00        |
| C50:1/C51:8        | 839.768               | 0.00±0.00        | 0.00±0.00        | 0.00±0.00        | 0.00±0.00        | 0.00±0.00        | 0.00±0.00        |
| C51:3/C52:10       | 849.752               | 0.00±0.00        | 0.00±0.00        | 0.00±0.00        | 0.00±0.00        | 0.00±0.00        | 0.00±0.00        |
| C51:2/C52:9        | 851.768               | 0.00±0.00        | 0.00±0.00        | 0.00±0.00        | 0.00±0.00        | 0.00±0.00        | 0.00±0.00        |
| C51:1/C52:8        | 853.690               | 0.00±0.00        | 0.00±0.00        | 0.00±0.00        | 0.00±0.00        | 0.00±0.00        | 0.00±0.00        |
| C51:0/C52:7        | 855.705               | 0.00±0.00        | 0.00±0.00        | 0.01±0.00        | 0.00±0.00        | 0.00±0.00        | 0.00±0.00        |
| C52:6              | 857.721               | 0.00±0.00        | 0.00±0.00        | 0.01±0.00        | 0.00±0.00        | 0.00±0.00        | 0.00±0.00        |
| C52:5              | 859.737               | 0.00±0.00        | 0.00±0.00        | 0.00±0.00        | 0.00±0.00        | 0.00±0.00        | 0.00±0.00        |
| C52:4/C53:11       | 861.752               | 0.00±0.00        | 0.00±0.00        | 0.00±0.00        | 0.00±0.00        | 0.00±0.00        | 0.00±0.00        |
| C52:3/C53:10       | 863.768               | 0.00±0.00        | 0.00±0.00        | 0.00±0.00        | 0.00±0.00        | 0.00±0.00        | 0.00±0.00        |
| C52:2/C53:9        | 865.784               | 0.00±0.00        | 0.00±0.00        | 0.00±0.00        | 0.00±0.00        | 0.00±0.00        | 0.00±0.00        |
| C52:1/C53:8        | 867.799               | 0.00±0.00        | 0.00±0.00        | 0.00±0.00        | 0.00±0.00        | 0.00±0.00        | 0.00±0.00        |
| C53:4/C54:11       | 875.768               | 0.00±0.00        | 0.00±0.00        | 0.00±0.00        | 0.00±0.00        | 0.00±0.00        | 0.00±0.00        |
| C53:3/C54:10       | 877.784               | 0.00±0.00        | 0.00±0.00        | 0.00±0.00        | 0.00±0.00        | 0.00±0.00        | 0.00±0.00        |
| C53:2/C54:9        | 879.705               | 0.00±0.00        | 0.00±0.00        | 0.00±0.00        | 0.00±0.00        | 0.00±0.00        | 0.00±0.00        |
| C53:1/C54:8        | 881.721               | 0.00±0.00        | 0.00±0.00        | 0.02±0.00        | 0.00±0.00        | 0.00±0.00        | 0.00±0.00        |
| C53:0/C54:7        | 883.737               | 0.01±0.00        | 0.00±0.00        | 0.06±0.00        | 0.01±0.00        | 0.00±0.00        | 0.00±0.00        |
| C54:6              | 885.752               | 0.03±0.00        | 0.00±0.00        | 0.04±0.01        | 0.02±0.00        | 0.00±0.00        | 0.00±0.00        |
| C54:5/C55:12       | 887.768               | 0.01±0.00        | 0.01±0.00        | 0.00±0.00        | 0.01±0.00        | 0.01±0.00        | 0.00±0.00        |
| C54:4/C55:11       | 889.784               | 0.00±0.00        | 0.01±0.00        | 0.00±0.00        | 0.00±0.00        | 0.01±0.00        | 0.00±0.00        |
| C54:3/C55:10       | 891.799               | 0.00±0.00        | 0.00±0.00        | 0.00±0.00        | 0.00±0.00        | 0.00±0.00        | 0.00±0.00        |
| C54:2/C55:9        | 893.815               | 0.00±0.00        | 0.00±0.00        | 0.00±0.00        | 0.00±0.00        | 0.00±0.00        | 0.00±0.00        |
| C55:4/C56:11       | 903.799               | 0.00±0.00        | 0.00±0.00        | 0.00±0.00        | 0.00±0.00        | 0.00±0.00        | 0.00±0.00        |
| C55:3/C56:10       | 905.721               | 0.00±0.00        | 0.00±0.00        | 0.00±0.00        | 0.00±0.00        | 0.00±0.00        | 0.00±0.00        |
| C55:2/C56:9        | 907.737               | 0.01±0.00        | 0.01±0.00        | 0.05±0.00        | 0.00±0.00        | 0.00±0.00        | 0.00±0.00        |
| C55:1/C56:8        | 909.752               | 0.03±0.00        | 0.01±0.00        | 0.22±0.04        | 0.02±0.00        | 0.00±0.00        | 0.00±0.00        |
| C55:0/C56:7        | 911.768               | 0.14±0.03        | 0.01±0.00        | 0.21±0.03        | 0.08±0.02        | 0.01±0.00        | 0.00±0.00        |
| C56:6              | 913.784               | 0.12±0.01        | 0.07±0.01        | 0.01±0.00        | 0.08±0.01        | 0.04±0.01        | 0.00±0.00        |
| C56:5/C57:12       | 915.799               | 0.00±0.00        | 0.05±0.01        | 0.03±0.01        | 0.00±0.00        | 0.04±0.00        | 0.02±0.00        |
| C56:4/C57:11       | 917.815               | 0.00±0.00        | 0.00±0.00        | 0.02±0.00        | 0.02±0.00        | 0.01±0.00        | 0.02±0.00        |
| C56:3/C57:10       | 919.831               | 0.00±0.00        | 0.00±0.00        | 0.00±0.00        | 0.02±0.00        | 0.02±0.01        | 0.01±0.00        |
| C57:3/C58:10       | 933.752               | 0.01±0.00        | 0.01±0.00        | 0.03±0.01        | 0.00±0.00        | 0.00±0.00        | 0.00±0.00        |
| C57:2/C58:9        | 935.768               | 0.02±0.01        | 0.01±0.00        | 0.08±0.01        | 0.01±0.00        | 0.00±0.00        | 0.00±0.00        |
| C57:1/C58:8        | 937.784               | 0.05±0.00        | 0.01±0.00        | 0.06±0.00        | 0.03±0.00        | 0.01±0.00        | 0.00±0.00        |
| C57:0/C58:7/C59:14 | 939.799               | 0.03±0.01        | 0.03±0.00        | 0.01±0.00        | 0.02±0.01        | 0.02±0.00        | 0.00±0.00        |
| C58:6/C59:13       | 941.815               | 0.01±0.00        | 0.02±0.00        | 0.01±0.00        | 0.01±0.00        | 0.01±0.00        | 0.01±0.00        |
| <b>Total FA</b>    |                       | <b>0.48±0.08</b> | <b>0.27±0.05</b> | <b>0.88±0.14</b> | <b>0.35±0.07</b> | <b>0.19±0.04</b> | <b>0.10±0.03</b> |
