# Supplementary material
Source: PubMed Central journal article supplement (PMC3605979)
Supplement: supp_M033837_jlr.M033837-3.pdf [file supp_M033837_jlr.M033837-3.pdf]

**Simulation of triacylglycerol ion profiles: Bioinformatics for interpretation of triacylglycerol biosyntheses**

Rowland H. Han, Miao Wang, Xiaoling Fang, and Xianlin Han  
Diabetes and Obesity Research Center  
Sanford-Burnham Medical Research Institute  
Orlando, FL 32827

**Table S3.** Quantification of individual triacylglycerol species determined by simulation

| <i>m/z</i> | Species and composition                                                                     |                                                                                              |                                                                                             |                                                              |
|------------|---------------------------------------------------------------------------------------------|----------------------------------------------------------------------------------------------|---------------------------------------------------------------------------------------------|--------------------------------------------------------------|
| 781.690    | C18:2 C14:0 C14:0 <br>0.004                                                                 | IC16:1 C16:1 C14:0<br>0.002                                                                  |                                                                                             |                                                              |
| 783.705    | C18:1 C14:0 C14:0 <br>0.013                                                                 | IC16:1 C16:0 C14:0<br>0.033                                                                  |                                                                                             |                                                              |
| 785.721    | C18:0 C14:0 C14:0 <br>0.004                                                                 | IC16:0 C16:0 C14:0<br>0.148                                                                  |                                                                                             |                                                              |
| 799.737    | C19:0 C14:0 C14:0 <br>0.000                                                                 | IC17:0 C16:0 C14:0<br>0.019                                                                  |                                                                                             |                                                              |
| 809.721    | C20:2 C14:0 C14:0 <br>0.000<br>IC16:1 C16:1 C16:0<br>0.037                                  | IC18:1 C16:1 C14:0 <br>0.055                                                                 | IC18:2 C16:0 C14:0 <br>0.156                                                                | IC17:1 C17:1 C14:0 <br>0.001                                 |
| 811.737    | C20:1 C14:0 C14:0 <br>0.001<br>IC16:1 C16:0 C16:0<br>0.312                                  | IC18:0 C16:1 C14:0 <br>0.015                                                                 | IC18:1 C16:0 C14:0 <br>0.546                                                                | IC17:1 C17:0 C14:0 <br>0.002                                 |
| 813.752    | C20:0 C14:0 C14:0 <br>0.000                                                                 | IC18:0 C16:0 C14:0 <br>0.106                                                                 | IC17:0 C17:0 C14:0 <br>0.001                                                                | IC16:0 C16:0 C16:0<br>1.094                                  |
| 833.721    | C22:4 C14:0 C14:0 <br>0.000<br>IC18:2 C18:2 C14:0 <br>0.039                                 | IC20:3 C16:1 C14:0 <br>0.001<br>IC18:2 C16:1 C16:1 <br>0.018                                 | IC20:4 C16:0 C14:0 <br>0.016<br>IC18:3 C16:1 C16:0<br>0.017                                 | IC18:3 C18:1 C14:0 <br>0.023                                 |
| 835.737    | C22:3 C14:0 C14:0 <br>0.000<br>IC18:2 C18:1 C14:0 <br>0.275<br>IC18:3 C16:0 C16:0<br>0.074  | IC20:2 C16:1 C14:0 <br>0.002<br>IC18:1 C16:1 C16:1 <br>0.061                                 | IC20:3 C16:0 C14:0 <br>0.009<br>IC18:2 C16:1 C16:0 <br>0.325                                | IC18:3 C18:0 C14:0 <br>0.006<br>IC17:1 C17:1 C16:1 <br>0.002 |
| 837.752    | C22:2 C14:0 C14:0 <br>0.000<br>IC18:2 C18:0 C14:0 <br>0.102<br>IC17:1 C17:0 C16:1 <br>0.004 | IC20:1 C16:1 C14:0 <br>0.003<br>IC18:1 C18:1 C14:0 <br>0.404<br>IC18:2 C16:0 C16:0 <br>1.555 | IC20:2 C16:0 C14:0 <br>0.011<br>IC18:0 C16:1 C16:1 <br>0.017<br>IC17:1 C17:1 C16:0<br>0.014 | IC19:1 C17:1 C14:0 <br>0.001<br>IC18:1 C16:1 C16:0 <br>1.138 |
| 839.768    | C22:1 C14:0 C14:0 <br>0.000                                                                 | IC20:0 C16:1 C14:0 <br>0.002                                                                 | IC20:1 C16:0 C14:0 <br>0.019                                                                | IC19:0 C17:1 C14:0 <br>0.001                                 |

|         |                              |                              |                              |                              |
|---------|------------------------------|------------------------------|------------------------------|------------------------------|
|         | IC19:1IC17:0IC14:0I<br>0.001 | IC18:1IC18:0IC14:0I<br>0.221 | IC18:0IC16:1IC16:0I<br>0.234 | IC17:0IC17:0IC16:1I<br>0.002 |
|         | IC18:1IC16:0IC16:0I<br>5.800 | IC17:1IC17:0IC16:0<br>0.029  |                              |                              |
| 841.784 | C22:0IC14:0IC14:0I<br>0.000  | IC20:0IC16:0IC14:0I<br>0.014 | IC19:0IC17:0IC14:0I<br>0.001 | IC18:0IC18:0IC14:0I<br>0.025 |
|         | IC18:0IC16:0IC16:0I<br>1.044 | IC17:0IC17:0IC16:0<br>0.012  |                              |                              |
| 849.752 | C23:3IC14:0IC14:0I<br>0.000  | IC21:2IC16:1IC14:0I<br>0.000 | IC20:2IC17:1IC14:0I<br>0.001 | IC20:3IC17:0IC14:0I<br>0.001 |
|         | IC19:0IC18:3IC14:0I<br>0.001 | IC19:1IC18:2IC14:0I<br>0.007 | IC19:1IC16:1IC16:1I<br>0.002 | IC18:1IC17:1IC16:1I<br>0.085 |
|         | IC18:2IC17:0IC16:1I<br>0.020 | IC18:2IC17:1IC16:0I<br>0.226 | IC18:3IC17:0IC16:0I<br>0.009 | IC17:1IC17:1IC17:1<br>0.000  |
| 851.768 | C21:2IC16:0IC14:0I<br>0.003  | IC20:1IC17:1IC14:0I<br>0.002 | IC20:2IC17:0IC14:0I<br>0.001 | IC19:0IC18:2IC14:0I<br>0.007 |
|         | IC19:1IC18:1IC14:0I<br>0.019 | IC19:0IC16:1IC16:1I<br>0.002 | IC19:1IC16:1IC16:0I<br>0.021 | IC18:0IC17:1IC16:1I<br>0.024 |
|         | IC18:1IC17:0IC16:1I<br>0.070 | IC18:1IC17:1IC16:0I<br>0.792 | IC18:2IC17:0IC16:0I<br>0.197 | IC17:1IC17:1IC17:0<br>0.001  |
| 853.690 | C20:0IC17:1IC14:0I<br>0.001  | IC20:1IC17:0IC14:0I<br>0.002 | IC19:0IC18:1IC14:0I<br>0.020 | IC19:1IC18:0IC14:0I<br>0.004 |
|         | IC19:0IC16:1IC16:0I<br>0.022 | IC18:0IC17:0IC16:1I<br>0.020 | IC19:1IC16:0IC16:0I<br>0.093 | IC18:0IC17:1IC16:0I<br>0.163 |
|         | IC18:1IC17:0IC16:0I<br>0.690 | IC17:1IC17:0IC17:0<br>0.001  |                              |                              |
| 855.705 | C22:6IC16:1IC14:0I<br>0.001  | IC20:0IC17:0IC14:0I<br>0.001 | IC20:4IC18:3IC14:0I<br>0.001 | IC19:0IC18:0IC14:0I<br>0.005 |
|         | IC18:3IC18:3IC16:1I<br>0.000 | IC19:0IC16:0IC16:0I<br>0.097 | IC18:0IC17:0IC16:0I<br>0.134 | IC17:0IC17:0IC17:0<br>0.000  |
| 857.721 | C22:5IC16:1IC14:0I<br>0.000  | IC22:6IC16:0IC14:0I<br>0.004 | IC20:3IC18:3IC14:0I<br>0.001 | IC20:4IC18:2IC14:0I<br>0.008 |
|         | IC20:4IC16:1IC16:1I<br>0.002 | IC18:3IC18:2IC16:1I<br>0.015 | IC18:3IC18:3IC16:0<br>0.003  |                              |
| 859.737 | C22:4IC16:1IC14:0I<br>0.001  | IC22:5IC16:0IC14:0I<br>0.003 | IC20:2IC18:3IC14:0I<br>0.001 | IC20:3IC18:2IC14:0I<br>0.006 |
|         | IC20:4IC18:1IC14:0I<br>0.028 | IC20:3IC16:1IC16:1I<br>0.001 | IC20:4IC16:1IC16:0I<br>0.033 | IC18:3IC18:1IC16:1I<br>0.050 |
|         | IC18:2IC18:2IC16:1I<br>0.086 | IC18:3IC18:2IC16:0I<br>0.123 | IC18:3IC17:1IC17:1<br>0.001  |                              |
| 861.752 | C22:3IC16:1IC14:0I<br>0.001  | IC22:4IC16:0IC14:0I<br>0.004 | IC20:1IC18:3IC14:0I<br>0.001 | IC20:2IC18:2IC14:0I<br>0.008 |
|         | IC20:3IC18:1IC14:0I<br>0.018 | IC20:4IC18:0IC14:0I<br>0.116 | IC20:2IC16:1IC16:1I<br>0.002 | IC20:3IC16:1IC16:0I<br>0.020 |
|         | IC18:3IC18:0IC16:1I<br>0.014 | IC18:2IC18:1IC16:1I<br>0.606 | IC20:4IC16:0IC16:0I<br>0.193 | IC18:3IC18:1IC16:0I<br>0.429 |
|         | IC18:2IC18:2IC16:0I<br>0.930 | IC18:2IC17:1IC17:1I<br>0.009 | IC18:3IC17:1IC17:0<br>0.001  |                              |
| 863.768 | C22:2IC16:1IC14:0I<br>0.001  | IC22:3IC16:0IC14:0I<br>0.005 | IC21:2IC17:1IC14:0I<br>0.000 | IC20:0IC18:3IC14:0I<br>0.001 |

|         |                              |                              |                              |                               |
|---------|------------------------------|------------------------------|------------------------------|-------------------------------|
|         | IC20:1 C18:2 C14:0 <br>0.013 | IC20:2 C18:1 C14:0 <br>0.022 | IC20:3 C18:0 C14:0 <br>0.012 | IC20:1 C16:1 C16:1 <br>0.003  |
|         | IC20:2 C16:1 C16:0 <br>0.023 | IC19:1 C17:1 C16:1 <br>0.002 | IC18:2 C18:0 C16:1 <br>0.214 | IC18:1 C18:1 C16:1 <br>0.885  |
|         | IC20:3 C16:0 C16:0 <br>0.087 | IC18:3 C18:0 C16:0 <br>0.096 | IC18:2 C18:1 C16:0 <br>6.805 | IC18:1 C17:1 C17:1 <br>0.030  |
|         | IC18:2 C17:1 C17:0 <br>0.014 | IC18:3 C17:0 C17:0 <br>0.000 |                              |                               |
|         | C22:1 C16:1 C14:0 <br>0.001  | IC22:2 C16:0 C14:0 <br>0.005 | IC21:2 C17:0 C14:0 <br>0.000 | IC20:0 C18:2 C14:0 <br>0.010  |
|         | IC20:1 C18:1 C14:0 <br>0.038 | IC20:2 C18:0 C14:0 <br>0.005 | IC19:1 C19:1 C14:0 <br>0.000 | IC20:0 C16:1 C16:1 <br>0.002  |
| 865.784 | IC20:1 C16:1 C16:0 <br>0.041 | IC19:0 C17:1 C16:1 <br>0.002 | IC19:1 C17:0 C16:1 <br>0.002 | IC18:1 C18:0 C16:1 <br>0.486  |
|         | IC20:2 C16:0 C16:0 <br>0.104 | IC19:1 C17:1 C16:0 <br>0.015 | IC18:2 C18:0 C16:0 <br>1.861 | IC18:1 C18:1 C16:0 <br>10.270 |
|         | IC18:0 C17:1 C17:1 <br>0.008 | IC18:1 C17:1 C17:0 <br>0.049 | IC18:2 C17:0 C17:0 <br>0.006 |                               |
|         | C22:0 C16:1 C14:0 <br>0.001  | IC22:1 C16:0 C14:0 <br>0.006 | IC20:0 C18:1 C14:0 <br>0.029 | IC20:1 C18:0 C14:0 <br>0.009  |
|         | IC19:1 C19:0 C14:0 <br>0.001 | IC20:0 C16:1 C16:0 <br>0.032 | IC19:0 C17:0 C16:1 <br>0.002 | IC18:0 C18:0 C16:1 <br>0.055  |
| 867.799 | IC20:1 C16:0 C16:0 <br>0.184 | IC19:0 C17:1 C16:0 <br>0.015 | IC19:1 C17:0 C16:0 <br>0.012 | IC18:1 C18:0 C16:0 <br>4.511  |
|         | IC18:0 C17:1 C17:0 <br>0.014 | IC18:1 C17:0 C17:0 <br>0.020 |                              |                               |
|         | C22:0 C16:0 C14:0 <br>0.007  | IC22:6 C17:1 C14:0 <br>0.000 | IC20:0 C18:0 C14:0 <br>0.007 | IC19:0 C19:0 C14:0 <br>0.000  |
| 869.815 | IC20:0 C16:0 C16:0 <br>0.141 | IC19:0 C17:0 C16:0 <br>0.012 | IC18:0 C18:0 C16:0 <br>0.374 | IC18:3 C18:3 C17:1 <br>0.000  |
|         | IC18:0 C17:0 C17:0 <br>0.006 |                              |                              |                               |
|         | C23:4 C16:1 C14:0 <br>0.000  | IC22:4 C17:1 C14:0 <br>0.000 | IC22:5 C17:0 C14:0 <br>0.000 | IC21:2 C18:3 C14:0 <br>0.000  |
| 873.752 | IC20:4 C19:1 C14:0 <br>0.001 | IC20:3 C17:1 C16:1 <br>0.002 | IC20:4 C17:0 C16:1 <br>0.002 | IC19:1 C18:3 C16:1 <br>0.001  |
|         | IC20:4 C17:1 C16:0 <br>0.023 | IC18:3 C18:1 C17:1 <br>0.035 | IC18:2 C18:2 C17:1 <br>0.060 | IC18:3 C18:2 C17:0 <br>0.008  |
|         | C23:3 C16:1 C14:0 <br>0.000  | IC23:4 C16:0 C14:0 <br>0.001 | IC22:3 C17:1 C14:0 <br>0.000 | IC22:4 C17:0 C14:0 <br>0.000  |
|         | IC21:2 C18:2 C14:0 <br>0.002 | IC20:3 C19:1 C14:0 <br>0.000 | IC20:4 C19:0 C14:0 <br>0.000 | IC21:2 C16:1 C16:1 <br>0.000  |
| 875.768 | IC20:2 C17:1 C16:1 <br>0.002 | IC20:3 C17:0 C16:1 <br>0.002 | IC19:0 C18:3 C16:1 <br>0.001 | IC19:1 C18:2 C16:1 <br>0.015  |
|         | IC20:3 C17:1 C16:0 <br>0.014 | IC20:4 C17:0 C16:0 <br>0.021 | IC19:1 C18:3 C16:0 <br>0.009 | IC18:3 C18:0 C17:1 <br>0.010  |
|         | IC18:2 C18:1 C17:1 <br>0.422 | IC18:3 C18:1 C17:0 <br>0.029 | IC18:2 C18:2 C17:0 <br>0.049 |                               |
| 877.784 | C23:3 C16:0 C14:0 <br>0.001  | IC22:2 C17:1 C14:0 <br>0.000 | IC22:3 C17:0 C14:0 <br>0.000 | IC21:2 C18:1 C14:0 <br>0.005  |
|         | IC20:2 C19:1 C14:0 <br>0.001 | IC20:3 C19:0 C14:0 <br>0.000 | IC21:2 C16:1 C16:0 <br>0.006 | IC20:1 C17:1 C16:1 <br>0.004  |
|         | IC20:2 C17:0 C16:1 <br>0.000 | IC19:0 C18:2 C16:1 <br>0.000 | IC19:1 C18:1 C16:1 <br>0.000 | IC20:2 C17:1 C16:0 <br>0.000  |

|         |                    |                    |                    |                    |
|---------|--------------------|--------------------|--------------------|--------------------|
|         | 0.002              | 0.016              | 0.043              | 0.016              |
|         | IC20:3 C17:0 C16:0 | IC19:0 C18:3 C16:0 | IC19:1 C18:2 C16:0 | IC19:1 C17:1 C17:1 |
|         | 0.011              | 0.009              | 0.132              | 0.001              |
|         | IC18:2 C18:0 C17:1 | IC18:1 C18:1 C17:1 | IC18:3 C18:0 C17:0 | IC18:2 C18:1 C17:0 |
|         | 0.149              | 0.616              | 0.008              | 0.348              |
|         | C22:1 C17:1 C14:0  | IC22:2 C17:0 C14:0 | IC22:6 C18:3 C14:0 | IC21:2 C18:0 C14:0 |
|         | 0.001              | 0.000              | 0.000              | 0.001              |
|         | IC20:1 C19:1 C14:0 | IC20:2 C19:0 C14:0 | IC20:0 C17:1 C16:1 | IC20:1 C17:0 C16:1 |
|         | 0.001              | 0.000              | 0.003              | 0.003              |
|         | IC19:0 C18:1 C16:1 | IC19:1 C18:0 C16:1 | IC21:2 C16:0 C16:0 | IC20:1 C17:1 C16:0 |
| 879.705 | 0.044              | 0.010              | 0.026              | 0.029              |
|         | IC20:2 C17:0 C16:0 | IC19:0 C18:2 C16:0 | IC19:1 C18:1 C16:0 | IC19:0 C17:1 C17:1 |
|         | 0.013              | 0.137              | 0.397              | 0.001              |
|         | IC19:1 C17:1 C17:0 | IC18:1 C18:0 C17:1 | IC18:2 C18:0 C17:0 | IC18:1 C18:1 C17:0 |
|         | 0.001              | 0.338              | 0.128              | 0.510              |
|         | IC18:3 C18:3 C18:3 |                    |                    |                    |
|         | 0.000              |                    |                    |                    |
|         | C22:0 C17:1 C14:0  | IC22:1 C17:0 C14:0 | IC22:5 C18:3 C14:0 | IC22:6 C18:2 C14:0 |
|         | 0.001              | 0.001              | 0.000              | 0.003              |
|         | IC20:0 C19:1 C14:0 | IC20:1 C19:0 C14:0 | IC20:4 C20:4 C14:0 | IC22:6 C16:1 C16:1 |
|         | 0.001              | 0.001              | 0.001              | 0.001              |
| 881.721 | IC20:0 C17:0 C16:1 | IC20:4 C18:3 C16:1 | IC19:0 C18:0 C16:1 | IC20:0 C17:1 C16:0 |
|         | 0.003              | 0.001              | 0.010              | 0.022              |
|         | IC20:1 C17:0 C16:0 | IC19:0 C18:1 C16:0 | IC19:1 C18:0 C16:0 | IC19:0 C17:1 C17:0 |
|         | 0.024              | 0.413              | 0.067              | 0.001              |
|         | IC18:0 C18:0 C17:1 | IC19:1 C17:0 C17:0 | IC18:1 C18:0 C17:0 | IC18:3 C18:3 C18:2 |
|         | 0.038              | 0.000              | 0.279              | 0.003              |
|         | C22:0 C17:0 C14:0  | IC22:4 C18:3 C14:0 | IC22:5 C18:2 C14:0 | IC22:6 C18:1 C14:0 |
|         | 0.001              | 0.000              | 0.002              | 0.007              |
|         | IC20:0 C19:0 C14:0 | IC20:4 C20:3 C14:0 | IC22:5 C16:1 C16:1 | IC22:6 C16:1 C16:0 |
|         | 0.001              | 0.001              | 0.001              | 0.009              |
| 883.737 | IC20:3 C18:3 C16:1 | IC20:4 C18:2 C16:1 | IC20:0 C17:0 C16:0 | IC20:4 C18:3 C16:0 |
|         | 0.001              | 0.018              | 0.018              | 0.012              |
|         | IC19:0 C18:0 C16:0 | IC19:0 C17:0 C17:0 | IC18:0 C18:0 C17:0 | IC18:3 C18:3 C18:1 |
|         | 0.069              | 0.001              | 0.031              | 0.010              |
|         | IC18:3 C18:2 C18:2 |                    |                    |                    |
|         | 0.036              |                    |                    |                    |
|         | C22:3 C18:3 C14:0  | IC22:4 C18:2 C14:0 | IC22:5 C18:1 C14:0 | IC22:6 C18:0 C14:0 |
|         | 0.000              | 0.003              | 0.007              | 0.006              |
|         | IC20:4 C20:2 C14:0 | IC20:3 C20:3 C14:0 | IC22:4 C16:1 C16:1 | IC22:5 C16:1 C16:0 |
|         | 0.001              | 0.000              | 0.001              | 0.007              |
| 885.752 | IC20:2 C18:3 C16:1 | IC20:3 C18:2 C16:1 | IC20:4 C18:1 C16:1 | IC22:6 C16:0 C16:0 |
|         | 0.001              | 0.014              | 0.059              | 0.042              |
|         | IC20:3 C18:3 C16:0 | IC20:4 C18:2 C16:0 | IC20:4 C17:1 C17:1 | IC18:3 C18:3 C18:0 |
|         | 0.008              | 0.178              | 0.001              | 0.003              |
|         | IC18:3 C18:2 C18:1 | IC18:2 C18:2 C18:2 |                    |                    |
|         | 0.250              | 0.142              |                    |                    |
| 887.768 | C23:4 C17:1 C14:0  | IC22:2 C18:3 C14:0 | IC22:3 C18:2 C14:0 | IC22:4 C18:1 C14:0 |
|         | 0.000              | 0.000              | 0.003              | 0.009              |
|         | IC22:5 C18:0 C14:0 | IC20:4 C20:1 C14:0 | IC20:3 C20:2 C14:0 | IC22:3 C16:1 C16:1 |
|         | 0.004              | 0.002              | 0.001              | 0.001              |
|         | IC22:4 C16:1 C16:0 | IC20:1 C18:3 C16:1 | IC20:2 C18:2 C16:1 | IC20:3 C18:1 C16:1 |
|         | 0.009              | 0.002              | 0.017              | 0.040              |

|         |                              |                              |                              |                              |
|---------|------------------------------|------------------------------|------------------------------|------------------------------|
|         | IC20:4 C18:0 C16:1 <br>0.212 | IC22:5 C16:0 C16:0 <br>0.032 | IC20:2 C18:3 C16:0 <br>0.010 | IC20:3 C18:2 C16:0 <br>0.124 |
|         | IC20:4 C18:1 C16:0 <br>0.674 | IC20:3 C17:1 C17:1 <br>0.001 | IC20:4 C17:1 C17:0 <br>0.001 | IC19:1 C18:3 C17:1 <br>0.001 |
|         | IC18:3 C18:2 C18:0 <br>0.082 | IC18:3 C18:1 C18:1 <br>0.361 | IC18:2 C18:2 C18:1 <br>1.497 |                              |
|         | C23:3 C17:1 C14:0 <br>0.000  | IC23:4 C17:0 C14:0 <br>0.000 | IC22:1 C18:3 C14:0 <br>0.000 | IC22:2 C18:2 C14:0 <br>0.004 |
|         | IC22:3 C18:1 C14:0 <br>0.010 | IC22:4 C18:0 C14:0 <br>0.003 | IC20:4 C20:0 C14:0 <br>0.001 | IC20:3 C20:1 C14:0 <br>0.001 |
|         | IC20:2 C20:2 C14:0 <br>0.000 | IC22:2 C16:1 C16:1 <br>0.001 | IC22:3 C16:1 C16:0 <br>0.011 | IC21:2 C17:1 C16:1 <br>0.001 |
|         | IC20:0 C18:3 C16:1 <br>0.002 | IC20:1 C18:2 C16:1 <br>0.030 | IC20:2 C18:1 C16:1 <br>0.048 | IC20:3 C18:0 C16:1 <br>0.024 |
| 889.784 | IC22:4 C16:0 C16:0 <br>0.042 | IC20:1 C18:3 C16:0 <br>0.017 | IC20:2 C18:2 C16:0 <br>0.147 | IC20:3 C18:1 C16:0 <br>0.372 |
|         | IC20:4 C18:0 C16:0 <br>1.796 | IC20:2 C17:1 C17:1 <br>0.001 | IC20:3 C17:1 C17:0 <br>0.001 | IC19:0 C18:3 C17:1 <br>0.001 |
|         | IC19:1 C18:2 C17:1 <br>0.010 | IC20:4 C17:0 C17:0 <br>0.001 | IC19:1 C18:3 C17:0 <br>0.001 | IC18:3 C18:1 C18:0 <br>0.199 |
|         | IC18:2 C18:2 C18:0 <br>0.597 | IC18:2 C18:1 C18:1 <br>4.395 |                              |                              |
|         | C23:3 C17:0 C14:0 <br>0.000  | IC22:0 C18:3 C14:0 <br>0.000 | IC22:1 C18:2 C14:0 <br>0.004 | IC22:2 C18:1 C14:0 <br>0.010 |
|         | IC22:3 C18:0 C14:0 <br>0.002 | IC21:2 C19:1 C14:0 <br>0.000 | IC20:3 C20:0 C14:0 <br>0.001 | IC20:2 C20:1 C14:0 <br>0.001 |
|         | IC22:1 C16:1 C16:1 <br>0.001 | IC22:2 C16:1 C16:0 <br>0.011 | IC21:2 C17:0 C16:1 <br>0.000 | IC20:0 C18:2 C16:1 <br>0.023 |
|         | IC20:1 C18:1 C16:1 <br>0.084 | IC20:2 C18:0 C16:1 <br>0.012 | IC19:1 C19:1 C16:1 <br>0.001 | IC22:3 C16:0 C16:0 <br>0.048 |
| 891.799 | IC21:2 C17:1 C16:0 <br>0.004 | IC20:0 C18:3 C16:0 <br>0.013 | IC20:1 C18:2 C16:0 <br>0.261 | IC20:2 C18:1 C16:0 <br>0.443 |
|         | IC20:3 C18:0 C16:0 <br>0.183 | IC20:1 C17:1 C17:1 <br>0.001 | IC20:2 C17:1 C17:0 <br>0.001 | IC19:0 C18:2 C17:1 <br>0.011 |
|         | IC19:1 C18:1 C17:1 <br>0.030 | IC20:3 C17:0 C17:0 <br>0.000 | IC19:0 C18:3 C17:0 <br>0.001 | IC19:1 C18:2 C17:0 <br>0.009 |
|         | IC18:3 C18:0 C18:0 <br>0.023 | IC18:2 C18:1 C18:0 <br>3.101 | IC18:1 C18:1 C18:1 <br>4.404 |                              |
| 893.815 | C22:0 C18:2 C14:0 <br>0.005  | IC22:1 C18:1 C14:0 <br>0.012 | IC22:2 C18:0 C14:0 <br>0.002 | IC21:2 C19:0 C14:0 <br>0.000 |
|         | IC20:2 C20:0 C14:0 <br>0.001 | IC20:1 C20:1 C14:0 <br>0.001 | IC22:0 C16:1 C16:1 <br>0.001 | IC22:1 C16:1 C16:0 <br>0.013 |
|         | IC20:0 C18:1 C16:1 <br>0.065 | IC20:1 C18:0 C16:1 <br>0.019 | IC19:1 C19:0 C16:1 <br>0.001 | IC22:2 C16:0 C16:0 <br>0.048 |
|         | IC21:2 C17:0 C16:0 <br>0.003 | IC20:0 C18:2 C16:0 <br>0.200 | IC20:1 C18:1 C16:0 <br>0.785 | IC20:2 C18:0 C16:0 <br>0.081 |
|         | IC19:1 C19:1 C16:0           | IC20:0 C17:1 C17:1           | IC20:1 C17:1 C17:0           | IC19:0 C18:1 C17:1           |

|         |                    |                    |                    |                    |
|---------|--------------------|--------------------|--------------------|--------------------|
|         | 0.004              | 0.001              | 0.002              | 0.031              |
|         | IC19:1 C18:0 C17:1 | IC20:2 C17:0 C17:0 | IC19:0 C18:2 C17:0 | IC19:1 C18:1 C17:0 |
|         | 0.007              | 0.001              | 0.009              | 0.024              |
|         | IC18:2 C18:0 C18:0 | IC18:1 C18:1 C18:0 |                    |                    |
|         | 0.448              | 3.587              |                    |                    |
|         | C22:0 C18:1 C14:0  | IC22:1 C18:0 C14:0 | IC20:1 C20:0 C14:0 | IC22:0 C16:1 C16:0 |
|         | 0.015              | 0.003              | 0.001              | 0.016              |
|         | IC22:6 C17:1 C16:1 | IC20:0 C18:0 C16:1 | IC19:0 C19:0 C16:1 | IC22:1 C16:0 C16:0 |
|         | 0.001              | 0.015              | 0.000              | 0.060              |
| 895.831 | IC20:0 C18:1 C16:0 | IC20:1 C18:0 C16:0 | IC19:1 C19:0 C16:0 | IC20:0 C17:1 C17:0 |
|         | 0.601              | 0.132              | 0.008              | 0.002              |
|         | IC20:4 C18:3 C17:1 | IC19:0 C18:0 C17:1 | IC20:1 C17:0 C17:0 | IC19:0 C18:1 C17:0 |
|         | 0.001              | 0.007              | 0.001              | 0.025              |
|         | IC19:1 C18:0 C17:0 | IC18:1 C18:0 C18:0 |                    |                    |
|         | 0.006              | 0.795              |                    |                    |
|         | C23:4 C18:3 C14:0  | IC22:0 C18:0 C14:0 | IC22:6 C19:1 C14:0 | IC20:0 C20:0 C14:0 |
|         | 0.000              | 0.003              | 0.000              | 0.000              |
|         | IC22:5 C17:1 C16:1 | IC22:6 C17:0 C16:1 | IC22:0 C16:0 C16:0 | IC22:6 C17:1 C16:0 |
|         | 0.001              | 0.001              | 0.070              | 0.006              |
| 897.846 | IC20:0 C18:0 C16:0 | IC19:0 C19:0 C16:0 | IC20:3 C18:3 C17:1 | IC20:4 C18:2 C17:1 |
|         | 0.101              | 0.003              | 0.001              | 0.012              |
|         | IC20:0 C17:0 C17:0 | IC20:4 C18:3 C17:0 | IC19:0 C18:0 C17:0 | IC19:1 C18:3 C18:3 |
|         | 0.001              | 0.001              | 0.006              | 0.000              |
|         | IC18:0 C18:0 C18:0 |                    |                    |                    |
|         | 0.058              |                    |                    |                    |
|         | C23:3 C18:2 C14:0  | IC23:4 C18:1 C14:0 | IC22:4 C19:1 C14:0 | IC22:5 C19:0 C14:0 |
|         | 0.001              | 0.002              | 0.000              | 0.000              |
|         | IC21:2 C20:3 C14:0 | IC23:3 C16:1 C16:1 | IC23:4 C16:1 C16:0 | IC22:3 C17:1 C16:1 |
|         | 0.000              | 0.000              | 0.003              | 0.001              |
|         | IC22:4 C17:0 C16:1 | IC21:2 C18:2 C16:1 | IC20:3 C19:1 C16:1 | IC20:4 C19:0 C16:1 |
|         | 0.001              | 0.004              | 0.001              | 0.001              |
| 901.784 | IC22:4 C17:1 C16:0 | IC22:5 C17:0 C16:0 | IC21:2 C18:3 C16:0 | IC20:4 C19:1 C16:0 |
|         | 0.007              | 0.004              | 0.002              | 0.012              |
|         | IC20:1 C18:3 C17:1 | IC20:2 C18:2 C17:1 | IC20:3 C18:1 C17:1 | IC20:4 C18:0 C17:1 |
|         | 0.002              | 0.012              | 0.028              | 0.147              |
|         | IC20:2 C18:3 C17:0 | IC20:3 C18:2 C17:0 | IC20:4 C18:1 C17:0 | IC19:0 C18:3 C18:2 |
|         | 0.001              | 0.008              | 0.036              | 0.006              |
|         | IC19:1 C18:3 C18:1 | IC19:1 C18:2 C18:2 |                    |                    |
|         | 0.018              | 0.037              |                    |                    |
| 903.799 | C23:3 C18:1 C14:0  | IC23:4 C18:0 C14:0 | IC22:3 C19:1 C14:0 | IC22:4 C19:0 C14:0 |
|         | 0.003              | 0.001              | 0.000              | 0.000              |
|         | IC21:2 C20:2 C14:0 | IC23:3 C16:1 C16:0 | IC22:2 C17:1 C16:1 | IC22:3 C17:0 C16:1 |

|         |                    |                    |                    |                    |
|---------|--------------------|--------------------|--------------------|--------------------|
|         | 0.000              | 0.003              | 0.001              | 0.001              |
|         | IC21:2 C18:1 C16:1 | IC20:2 C19:1 C16:1 | IC20:3 C19:0 C16:1 | IC23:4 C16:0 C16:0 |
|         | 0.012              | 0.001              | 0.001              | 0.011              |
|         | IC22:3 C17:1 C16:0 | IC22:4 C17:0 C16:0 | IC21:2 C18:2 C16:0 | IC20:3 C19:1 C16:0 |
|         | 0.007              | 0.005              | 0.037              | 0.007              |
|         | IC20:4 C19:0 C16:0 | IC21:2 C17:1 C17:1 | IC20:0 C18:3 C17:1 | IC20:1 C18:2 C17:1 |
|         | 0.011              | 0.000              | 0.001              | 0.021              |
|         | IC20:2 C18:1 C17:1 | IC20:3 C18:0 C17:1 | IC20:1 C18:3 C17:0 | IC20:2 C18:2 C17:0 |
|         | 0.033              | 0.016              | 0.001              | 0.010              |
|         | IC20:3 C18:1 C17:0 | IC20:4 C18:0 C17:0 | IC19:0 C18:3 C18:1 | IC19:1 C18:3 C18:0 |
|         | 0.023              | 0.147              | 0.018              | 0.004              |
|         | IC19:0 C18:2 C18:2 | IC19:1 C18:2 C18:1 |                    |                    |
|         | 0.038              | 0.212              |                    |                    |
|         | C23:3 C18:0 C14:0  | IC22:2 C19:1 C14:0 | IC22:3 C19:0 C14:0 | IC22:6 C20:4 C14:0 |
|         | 0.001              | 0.000              | 0.000              | 0.000              |
|         | IC21:2 C20:1 C14:0 | IC22:1 C17:1 C16:1 | IC22:2 C17:0 C16:1 | IC22:6 C18:3 C16:1 |
|         | 0.000              | 0.001              | 0.001              | 0.000              |
|         | IC21:2 C18:0 C16:1 | IC20:1 C19:1 C16:1 | IC20:2 C19:0 C16:1 | IC23:3 C16:0 C16:0 |
|         | 0.003              | 0.002              | 0.001              | 0.014              |
|         | IC22:2 C17:1 C16:0 | IC22:3 C17:0 C16:0 | IC21:2 C18:1 C16:0 | IC20:2 C19:1 C16:0 |
|         | 0.008              | 0.006              | 0.112              | 0.008              |
| 905.721 | IC20:3 C19:0 C16:0 | IC21:2 C17:1 C17:0 | IC20:0 C18:2 C17:1 | IC20:1 C18:1 C17:1 |
|         | 0.006              | 0.000              | 0.016              | 0.059              |
|         | IC20:2 C18:0 C17:1 | IC19:1 C19:1 C17:1 | IC20:0 C18:3 C17:0 | IC20:1 C18:2 C17:0 |
|         | 0.008              | 0.000              | 0.001              | 0.017              |
|         | IC20:2 C18:1 C17:0 | IC20:3 C18:0 C17:0 | IC20:4 C18:3 C18:3 | IC19:0 C18:3 C18:0 |
|         | 0.027              | 0.015              | 0.000              | 0.004              |
|         | IC19:0 C18:2 C18:1 | IC19:1 C18:2 C18:0 | IC19:1 C18:1 C18:1 |                    |
|         | 0.220              | 0.064              | 0.309              |                    |
| 907.737 | C22:1 C19:1 C14:0  | IC22:2 C19:0 C14:0 | IC22:5 C20:4 C14:0 | IC22:6 C20:3 C14:0 |
|         | 0.000              | 0.000              | 0.000              | 0.000              |
|         | IC21:2 C20:0 C14:0 | IC22:0 C17:1 C16:1 | IC22:1 C17:0 C16:1 | IC22:5 C18:3 C16:1 |
|         | 0.000              | 0.002              | 0.001              | 0.000              |
|         | IC22:6 C18:2 C16:1 | IC20:0 C19:1 C16:1 | IC20:1 C19:0 C16:1 | IC20:4 C20:4 C16:1 |
|         | 0.006              | 0.002              | 0.002              | 0.001              |
|         | IC22:1 C17:1 C16:0 | IC22:2 C17:0 C16:0 | IC22:6 C18:3 C16:0 | IC21:2 C18:0 C16:0 |
|         | 0.009              | 0.006              | 0.003              | 0.019              |
|         | IC20:1 C19:1 C16:0 | IC20:2 C19:0 C16:0 | IC20:0 C18:1 C17:1 | IC20:1 C18:0 C17:1 |
|         | 0.014              | 0.007              | 0.045              | 0.013              |
|         | IC19:1 C19:0 C17:1 | IC21:2 C17:0 C17:0 | IC20:0 C18:2 C17:0 | IC20:1 C18:1 C17:0 |
|         | 0.001              | 0.000              | 0.013              | 0.048              |
|         | IC20:2 C18:0 C17:0 | IC19:1 C19:1 C17:0 | IC20:3 C18:3 C18:3 | IC20:4 C18:3 C18:2 |
|         | 0.007              | 0.000              | 0.000              | 0.007              |

|         |                              |                              |                              |                              |
|---------|------------------------------|------------------------------|------------------------------|------------------------------|
|         | IC19:0IC18:2IC18:0I<br>0.067 | IC19:0IC18:1IC18:1I<br>0.321 | IC19:1IC18:1IC18:0<br>0.139  |                              |
| 909.752 | C22:0IC19:1IC14:0I<br>0.000  | IC22:1IC19:0IC14:0I<br>0.000 | IC22:4IC20:4IC14:0I<br>0.000 | IC22:5IC20:3IC14:0I<br>0.000 |
|         | IC22:6IC20:2IC14:0I<br>0.000 | IC22:0IC17:0IC16:1I<br>0.001 | IC22:4IC18:3IC16:1I<br>0.001 | IC22:5IC18:2IC16:1I<br>0.005 |
|         | IC22:6IC18:1IC16:1I<br>0.016 | IC20:0IC19:0IC16:1I<br>0.001 | IC20:4IC20:3IC16:1I<br>0.002 | IC22:0IC17:1IC16:0I<br>0.011 |
|         | IC22:1IC17:0IC16:0I<br>0.008 | IC22:5IC18:3IC16:0I<br>0.003 | IC22:6IC18:2IC16:0I<br>0.050 | IC20:0IC19:1IC16:0I<br>0.011 |
|         | IC20:1IC19:0IC16:0I<br>0.012 | IC20:4IC20:4IC16:0I<br>0.012 | IC22:6IC17:1IC17:1I<br>0.000 | IC20:0IC18:0IC17:1I<br>0.010 |
|         | IC19:0IC19:0IC17:1I<br>0.000 | IC20:0IC18:1IC17:0I<br>0.037 | IC20:1IC18:0IC17:0I<br>0.011 | IC19:1IC19:0IC17:0I<br>0.001 |
|         | IC20:2IC18:3IC18:3I<br>0.000 | IC20:3IC18:3IC18:2I<br>0.006 | IC20:4IC18:3IC18:1I<br>0.023 | IC20:4IC18:2IC18:2I<br>0.047 |
|         | IC19:0IC18:1IC18:0I<br>0.145 | IC19:1IC18:0IC18:0<br>0.016  |                              |                              |
| 911.768 | C22:0IC19:0IC14:0I<br>0.000  | IC22:3IC20:4IC14:0I<br>0.000 | IC22:4IC20:3IC14:0I<br>0.000 | IC22:5IC20:2IC14:0I<br>0.000 |
|         | IC22:6IC20:1IC14:0I<br>0.000 | IC22:3IC18:3IC16:1I<br>0.001 | IC22:4IC18:2IC16:1I<br>0.007 | IC22:5IC18:1IC16:1I<br>0.015 |
|         | IC22:6IC18:0IC16:1I<br>0.011 | IC20:4IC20:2IC16:1I<br>0.002 | IC20:3IC20:3IC16:1I<br>0.001 | IC22:0IC17:0IC16:0I<br>0.009 |
|         | IC22:4IC18:3IC16:0I<br>0.004 | IC22:5IC18:2IC16:0I<br>0.046 | IC22:6IC18:1IC16:0I<br>0.159 | IC20:0IC19:0IC16:0I<br>0.009 |
|         | IC20:4IC20:3IC16:0I<br>0.017 | IC22:5IC17:1IC17:1I<br>0.000 | IC22:6IC17:1IC17:0I<br>0.000 | IC20:0IC18:0IC17:0I<br>0.008 |
|         | IC19:0IC19:0IC17:0I<br>0.000 | IC20:1IC18:3IC18:3I<br>0.001 | IC20:2IC18:3IC18:2I<br>0.007 | IC20:3IC18:3IC18:1I<br>0.017 |
|         | IC20:4IC18:3IC18:0I<br>0.060 | IC20:3IC18:2IC18:2I<br>0.035 | IC20:4IC18:2IC18:1I<br>0.276 | IC19:0IC18:0IC18:0<br>0.016  |
|         | 913.784                      | C22:2IC20:4IC14:0I<br>0.000  | IC22:3IC20:3IC14:0I<br>0.000 | IC22:4IC20:2IC14:0I<br>0.000 |
|         | IC22:6IC20:0IC14:0I<br>0.000 | IC23:4IC17:1IC16:1I<br>0.000 | IC22:2IC18:3IC16:1I<br>0.001 | IC22:3IC18:2IC16:1I<br>0.008 |
|         | IC22:4IC18:1IC16:1I<br>0.019 | IC22:5IC18:0IC16:1I<br>0.009 | IC20:4IC20:1IC16:1I<br>0.004 | IC20:3IC20:2IC16:1I<br>0.002 |
|         | IC22:3IC18:3IC16:0I<br>0.004 | IC22:4IC18:2IC16:0I<br>0.059 | IC22:5IC18:1IC16:0I<br>0.137 | IC22:6IC18:0IC16:0I<br>0.094 |
|         | IC20:4IC20:2IC16:0I<br>0.020 | IC20:3IC20:3IC16:0I<br>0.005 | IC22:4IC17:1IC17:1I<br>0.000 | IC22:5IC17:1IC17:0I<br>0.000 |



|         |                    |                    |                    |                    |
|---------|--------------------|--------------------|--------------------|--------------------|
|         | IC21:2 C18:3 C17:1 | IC20:4 C19:1 C17:1 | IC22:6 C17:0 C17:0 | IC20:0 C18:3 C18:3 |
|         | 0.000              | 0.001              | 0.000              | 0.000              |
|         | IC20:1 C18:3 C18:2 | IC20:2 C18:3 C18:1 | IC20:3 C18:3 C18:0 | IC20:2 C18:2 C18:2 |
|         | 0.012              | 0.020              | 0.008              | 0.041              |
|         | IC20:3 C18:2 C18:1 | IC20:4 C18:2 C18:0 | IC20:4 C18:1 C18:1 |                    |
|         | 0.198              | 0.614              | 0.521              |                    |
|         | C23:4 C19:1 C14:0  | IC22:1 C20:4 C14:0 | IC22:2 C20:3 C14:0 | IC22:3 C20:2 C14:0 |
|         | 0.000              | 0.001              | 0.000              | 0.000              |
|         | IC22:4 C20:1 C14:0 | IC22:5 C20:0 C14:0 | IC23:3 C17:1 C16:1 | IC23:4 C17:0 C16:1 |
|         | 0.000              | 0.000              | 0.000              | 0.000              |
|         | IC22:1 C18:3 C16:1 | IC22:2 C18:2 C16:1 | IC22:3 C18:1 C16:1 | IC22:4 C18:0 C16:1 |
|         | 0.001              | 0.008              | 0.022              | 0.006              |
|         | IC20:4 C20:0 C16:1 | IC20:3 C20:1 C16:1 | IC20:2 C20:2 C16:1 | IC23:4 C17:1 C16:0 |
|         | 0.003              | 0.003              | 0.001              | 0.002              |
|         | IC22:2 C18:3 C16:0 | IC22:3 C18:2 C16:0 | IC22:4 C18:1 C16:0 | IC22:5 C18:0 C16:0 |
|         | 0.004              | 0.067              | 0.178              | 0.067              |
| 915.799 | IC20:4 C20:1 C16:0 | IC20:3 C20:2 C16:0 | IC22:3 C17:1 C17:1 | IC22:4 C17:1 C17:0 |
|         | 0.036              | 0.011              | 0.000              | 0.001              |
|         | IC21:2 C18:2 C17:1 | IC20:3 C19:1 C17:1 | IC20:4 C19:0 C17:1 | IC22:5 C17:0 C17:0 |
|         | 0.003              | 0.001              | 0.001              | 0.000              |
|         | IC21:2 C18:3 C17:0 | IC20:4 C19:1 C17:0 | IC20:0 C18:3 C18:2 | IC20:1 C18:3 C18:1 |
|         | 0.000              | 0.001              | 0.009              | 0.035              |
|         | IC20:2 C18:3 C18:0 | IC19:1 C19:1 C18:3 | IC20:1 C18:2 C18:2 | IC20:2 C18:2 C18:1 |
|         | 0.005              | 0.000              | 0.073              | 0.236              |
|         | IC20:3 C18:2 C18:0 | IC20:3 C18:1 C18:1 | IC20:4 C18:1 C18:0 |                    |
|         | 0.108              | 0.289              | 1.717              |                    |
| 917.815 | C23:3 C19:1 C14:0  | IC23:4 C19:0 C14:0 | IC22:0 C20:4 C14:0 | IC22:1 C20:3 C14:0 |
|         | 0.000              | 0.000              | 0.001              | 0.000              |
|         | IC22:2 C20:2 C14:0 | IC22:3 C20:1 C14:0 | IC22:4 C20:0 C14:0 | IC21:2 C21:2 C14:0 |
|         | 0.000              | 0.000              | 0.000              | 0.000              |
|         | IC23:3 C17:0 C16:1 | IC22:0 C18:3 C16:1 | IC22:1 C18:2 C16:1 | IC22:2 C18:1 C16:1 |
|         | 0.000              | 0.001              | 0.010              | 0.022              |
|         | IC22:3 C18:0 C16:1 | IC21:2 C19:1 C16:1 | IC20:3 C20:0 C16:1 | IC20:2 C20:1 C16:1 |
|         | 0.005              | 0.000              | 0.002              | 0.003              |
|         | IC23:3 C17:1 C16:0 | IC23:4 C17:0 C16:0 | IC22:1 C18:3 C16:0 | IC22:2 C18:2 C16:0 |
|         | 0.002              | 0.001              | 0.006              | 0.068              |
|         | IC22:3 C18:1 C16:0 | IC22:4 C18:0 C16:0 | IC20:4 C20:0 C16:0 | IC20:3 C20:1 C16:0 |
|         | 0.202              | 0.046              | 0.027              | 0.020              |
|         | IC20:2 C20:2 C16:0 | IC22:2 C17:1 C17:1 | IC22:3 C17:1 C17:0 | IC21:2 C18:1 C17:1 |
|         | 0.006              | 0.000              | 0.001              | 0.008              |
|         | IC20:2 C19:1 C17:1 | IC20:3 C19:0 C17:1 | IC22:4 C17:0 C17:0 | IC21:2 C18:2 C17:0 |
|         | 0.001              | 0.001              | 0.000              | 0.002              |

|         |                              |                              |                              |                              |
|---------|------------------------------|------------------------------|------------------------------|------------------------------|
|         | IC20:3IC19:1IC17:0I<br>0.001 | IC20:4IC19:0IC17:0I<br>0.001 | IC20:0IC18:3IC18:1I<br>0.027 | IC20:1IC18:3IC18:0I<br>0.008 |
|         | IC19:1IC19:0IC18:3I<br>0.000 | IC20:0IC18:2IC18:2I<br>0.056 | IC20:1IC18:2IC18:1I<br>0.418 | IC20:2IC18:2IC18:0I<br>0.075 |
|         | IC19:1IC19:1IC18:2I<br>0.003 | IC20:2IC18:1IC18:1I<br>0.345 | IC20:3IC18:1IC18:0I<br>0.266 | IC20:4IC18:0IC18:0<br>0.803  |
|         | C23:3IC19:0IC14:0I<br>0.000  | IC22:0IC20:3IC14:0I<br>0.001 | IC22:1IC20:2IC14:0I<br>0.000 | IC22:2IC20:1IC14:0I<br>0.000 |
|         | IC22:3IC20:0IC14:0I<br>0.000 | IC22:0IC18:2IC16:1I<br>0.011 | IC22:1IC18:1IC16:1I<br>0.028 | IC22:2IC18:0IC16:1I<br>0.005 |
|         | IC21:2IC19:0IC16:1I<br>0.000 | IC20:2IC20:0IC16:1I<br>0.002 | IC20:1IC20:1IC16:1I<br>0.002 | IC23:3IC17:0IC16:0I<br>0.002 |
|         | IC22:0IC18:3IC16:0I<br>0.006 | IC22:1IC18:2IC16:0I<br>0.085 | IC22:2IC18:1IC16:0I<br>0.206 | IC22:3IC18:0IC16:0I<br>0.034 |
|         | IC21:2IC19:1IC16:0I<br>0.002 | IC20:3IC20:0IC16:0I<br>0.015 | IC20:2IC20:1IC16:0I<br>0.020 | IC22:1IC17:1IC17:1I<br>0.000 |
| 919.831 | IC22:2IC17:1IC17:0I<br>0.001 | IC22:6IC18:3IC17:1I<br>0.000 | IC21:2IC18:0IC17:1I<br>0.002 | IC20:1IC19:1IC17:1I<br>0.001 |
|         | IC20:2IC19:0IC17:1I<br>0.001 | IC22:3IC17:0IC17:0I<br>0.000 | IC21:2IC18:1IC17:0I<br>0.007 | IC20:2IC19:1IC17:0I<br>0.001 |
|         | IC20:3IC19:0IC17:0I<br>0.000 | IC20:0IC18:3IC18:0I<br>0.006 | IC19:0IC19:0IC18:3I<br>0.000 | IC20:0IC18:2IC18:1I<br>0.320 |
|         | IC20:1IC18:2IC18:0I<br>0.127 | IC19:1IC19:0IC18:2I<br>0.005 | IC20:1IC18:1IC18:1I<br>0.611 | IC20:2IC18:1IC18:0I<br>0.164 |
|         | IC19:1IC19:1IC18:1I<br>0.007 | IC20:3IC18:0IC18:0<br>0.071  |                              |                              |
|         | C22:0IC20:2IC14:0I<br>0.000  | IC22:1IC20:1IC14:0I<br>0.001 | IC22:2IC20:0IC14:0I<br>0.000 | IC22:0IC18:1IC16:1I<br>0.032 |
|         | IC22:1IC18:0IC16:1I<br>0.006 | IC20:1IC20:0IC16:1I<br>0.003 | IC22:0IC18:2IC16:0I<br>0.099 | IC22:1IC18:1IC16:0I<br>0.256 |
|         | IC22:2IC18:0IC16:0I<br>0.035 | IC21:2IC19:0IC16:0I<br>0.002 | IC20:2IC20:0IC16:0I<br>0.015 | IC20:1IC20:1IC16:0I<br>0.014 |
|         | IC22:0IC17:1IC17:1I<br>0.001 | IC22:1IC17:1IC17:0I<br>0.001 | IC22:5IC18:3IC17:1I<br>0.000 | IC22:6IC18:2IC17:1I<br>0.004 |
| 921.846 | IC20:0IC19:1IC17:1I<br>0.001 | IC20:1IC19:0IC17:1I<br>0.001 | IC20:4IC20:4IC17:1I<br>0.001 | IC22:2IC17:0IC17:0I<br>0.000 |
|         | IC22:6IC18:3IC17:0I<br>0.000 | IC21:2IC18:0IC17:0I<br>0.002 | IC20:1IC19:1IC17:0I<br>0.001 | IC20:2IC19:0IC17:0I<br>0.001 |
|         | IC20:0IC18:2IC18:0I<br>0.097 | IC19:0IC19:0IC18:2I<br>0.002 | IC20:0IC18:1IC18:1I<br>0.467 | IC20:1IC18:1IC18:0I<br>0.275 |
|         | IC19:1IC19:0IC18:1I<br>0.015 | IC20:2IC18:0IC18:0I<br>0.020 | IC19:1IC19:1IC18:0<br>0.002  |                              |

|                    |                    |                    |                    |                    |
|--------------------|--------------------|--------------------|--------------------|--------------------|
| 923.862            | C23:4 C20:4 C14:0  | IC22:0 C20:1 C14:0 | IC22:1 C20:0 C14:0 | IC22:6 C21:2 C14:0 |
|                    | 0.000              | 0.001              | 0.000              | 0.000              |
|                    | IC23:4 C18:3 C16:1 | IC22:0 C18:0 C16:1 | IC22:6 C19:1 C16:1 | IC20:0 C20:0 C16:1 |
|                    | 0.000              | 0.007              | 0.000              | 0.001              |
|                    | IC22:0 C18:1 C16:0 | IC22:1 C18:0 C16:0 | IC20:1 C20:0 C16:0 | IC22:0 C17:1 C17:0 |
|                    | 0.299              | 0.043              | 0.022              | 0.001              |
|                    | IC22:4 C18:3 C17:1 | IC22:5 C18:2 C17:1 | IC22:6 C18:1 C17:1 | IC20:0 C19:0 C17:1 |
|                    | 0.000              | 0.004              | 0.011              | 0.001              |
| IC20:4 C20:3 C17:1 | IC22:1 C17:0 C17:0 | IC22:5 C18:3 C17:0 | IC22:6 C18:2 C17:0 |                    |
| 0.001              | 0.000              | 0.000              | 0.003              |                    |
| IC20:0 C19:1 C17:0 | IC20:1 C19:0 C17:0 | IC20:4 C20:4 C17:0 | IC21:2 C18:3 C18:3 |                    |
| 0.001              | 0.001              | 0.001              | 0.000              |                    |
| IC20:4 C19:1 C18:3 | IC20:0 C18:1 C18:0 | IC19:0 C19:0 C18:1 | IC20:1 C18:0 C18:0 |                    |
| 0.000              | 0.211              | 0.007              | 0.031              |                    |
| IC19:1 C19:0 C18:0 |                    |                    |                    |                    |
| 0.004              |                    |                    |                    |                    |
| 925.784            | C23:3 C20:4 C14:0  | IC23:4 C20:3 C14:0 | IC22:0 C20:0 C14:0 | IC22:5 C21:2 C14:0 |
|                    | 0.000              | 0.000              | 0.000              | 0.000              |
|                    | IC23:3 C18:3 C16:1 | IC23:4 C18:2 C16:1 | IC22:5 C19:1 C16:1 | IC22:6 C19:0 C16:1 |
|                    | 0.000              | 0.002              | 0.000              | 0.000              |
|                    | IC21:2 C20:4 C16:1 | IC23:4 C18:3 C16:0 | IC22:0 C18:0 C16:0 | IC22:6 C19:1 C16:0 |
|                    | 0.001              | 0.001              | 0.050              | 0.003              |
|                    | IC20:0 C20:0 C16:0 | IC22:3 C18:3 C17:1 | IC22:4 C18:2 C17:1 | IC22:5 C18:1 C17:1 |
|                    | 0.007              | 0.000              | 0.005              | 0.010              |
| IC22:6 C18:0 C17:1 | IC20:4 C20:2 C17:1 | IC20:3 C20:3 C17:1 | IC22:0 C17:0 C17:0 |                    |
| 0.008              | 0.002              | 0.000              | 0.000              |                    |
| IC22:4 C18:3 C17:0 | IC22:5 C18:2 C17:0 | IC22:6 C18:1 C17:0 | IC20:0 C19:0 C17:0 |                    |
| 0.000              | 0.003              | 0.009              | 0.001              |                    |
| IC20:4 C20:3 C17:0 | IC21:2 C18:3 C18:2 | IC20:3 C19:1 C18:3 | IC20:4 C19:0 C18:3 |                    |
| 0.001              | 0.002              | 0.000              | 0.000              |                    |
| IC20:4 C19:1 C18:2 | IC20:0 C18:0 C18:0 | IC19:0 C19:0 C18:0 |                    |                    |
| 0.006              | 0.024              | 0.002              |                    |                    |
| 927.799            | C23:3 C20:3 C14:0  | IC23:4 C20:2 C14:0 | IC22:4 C21:2 C14:0 | IC23:3 C18:2 C16:1 |
|                    | 0.000              | 0.000              | 0.000              | 0.002              |
|                    | IC23:4 C18:1 C16:1 | IC22:4 C19:1 C16:1 | IC22:5 C19:0 C16:1 | IC21:2 C20:3 C16:1 |
|                    | 0.005              | 0.000              | 0.000              | 0.000              |
|                    | IC23:3 C18:3 C16:0 | IC23:4 C18:2 C16:0 | IC22:5 C19:1 C16:0 | IC22:6 C19:0 C16:0 |
|                    | 0.001              | 0.016              | 0.003              | 0.003              |
| IC21:2 C20:4 C16:0 | IC23:4 C17:1 C17:1 | IC22:2 C18:3 C17:1 | IC22:3 C18:2 C17:1 |                    |
| 0.005              | 0.000              | 0.000              | 0.005              |                    |
| IC22:4 C18:1 C17:1 | IC22:5 C18:0 C17:1 | IC20:4 C20:1 C17:1 | IC20:3 C20:2 C17:1 |                    |
| 0.013              | 0.006              | 0.003              | 0.001              |                    |

|         |                              |                              |                              |                              |
|---------|------------------------------|------------------------------|------------------------------|------------------------------|
|         | IC22:3IC18:3IC17:0I<br>0.000 | IC22:4IC18:2IC17:0I<br>0.004 | IC22:5IC18:1IC17:0I<br>0.008 | IC22:6IC18:0IC17:0I<br>0.008 |
|         | IC20:4IC20:2IC17:0I<br>0.001 | IC20:3IC20:3IC17:0I<br>0.000 | IC21:2IC18:3IC18:1I<br>0.005 | IC20:2IC19:1IC18:3I<br>0.000 |
|         | IC20:3IC19:0IC18:3I<br>0.000 | IC21:2IC18:2IC18:2I<br>0.010 | IC20:3IC19:1IC18:2I<br>0.005 | IC20:4IC19:0IC18:2I<br>0.005 |
|         | IC20:4IC19:1IC18:1I<br>0.021 |                              |                              |                              |
|         | C23:3IC20:2IC14:0I<br>0.000  | IC23:4IC20:1IC14:0I<br>0.000 | IC22:3IC21:2IC14:0I<br>0.000 | IC22:6IC22:6IC14:0I<br>0.000 |
|         | IC23:3IC18:1IC16:1I<br>0.006 | IC23:4IC18:0IC16:1I<br>0.001 | IC22:3IC19:1IC16:1I<br>0.001 | IC22:4IC19:0IC16:1I<br>0.000 |
|         | IC21:2IC20:2IC16:1I<br>0.000 | IC23:3IC18:2IC16:0I<br>0.019 | IC23:4IC18:1IC16:0I<br>0.049 | IC22:4IC19:1IC16:0I<br>0.003 |
|         | IC22:5IC19:0IC16:0I<br>0.002 | IC21:2IC20:3IC16:0I<br>0.003 | IC23:3IC17:1IC17:1I<br>0.000 | IC23:4IC17:1IC17:0I<br>0.000 |
|         | IC22:1IC18:3IC17:1I<br>0.001 | IC22:2IC18:2IC17:1I<br>0.005 | IC22:3IC18:1IC17:1I<br>0.015 | IC22:4IC18:0IC17:1I<br>0.004 |
| 929.815 | IC20:4IC20:0IC17:1I<br>0.002 | IC20:3IC20:1IC17:1I<br>0.002 | IC20:2IC20:2IC17:1I<br>0.001 | IC22:2IC18:3IC17:0I<br>0.000 |
|         | IC22:3IC18:2IC17:0I<br>0.004 | IC22:4IC18:1IC17:0I<br>0.011 | IC22:5IC18:0IC17:0I<br>0.006 | IC20:4IC20:1IC17:0I<br>0.002 |
|         | IC20:3IC20:2IC17:0I<br>0.001 | IC22:6IC18:3IC18:3I<br>0.000 | IC21:2IC18:3IC18:0I<br>0.001 | IC20:1IC19:1IC18:3I<br>0.001 |
|         | IC20:2IC19:0IC18:3I<br>0.000 | IC21:2IC18:2IC18:1I<br>0.059 | IC20:2IC19:1IC18:2I<br>0.006 | IC20:3IC19:0IC18:2I<br>0.004 |
|         | IC20:3IC19:1IC18:1I<br>0.014 | IC20:4IC19:0IC18:1I<br>0.018 | IC20:4IC19:1IC18:0I<br>0.074 |                              |
| 931.737 | C23:3IC20:1IC14:0I<br>0.000  | IC23:4IC20:0IC14:0I<br>0.000 | IC22:2IC21:2IC14:0I<br>0.000 | IC22:6IC22:5IC14:0I<br>0.000 |
|         | IC23:3IC18:0IC16:1I<br>0.001 | IC22:2IC19:1IC16:1I<br>0.001 | IC22:3IC19:0IC16:1I<br>0.000 | IC22:6IC20:4IC16:1I<br>0.001 |
|         | IC21:2IC20:1IC16:1I<br>0.001 | IC23:3IC18:1IC16:0I<br>0.058 | IC23:4IC18:0IC16:0I<br>0.008 | IC22:3IC19:1IC16:0I<br>0.004 |
|         | IC22:4IC19:0IC16:0I<br>0.003 | IC21:2IC20:2IC16:0I<br>0.003 | IC23:3IC17:1IC17:0I<br>0.000 | IC22:0IC18:3IC17:1I<br>0.001 |
|         | IC22:1IC18:2IC17:1I<br>0.007 | IC22:2IC18:1IC17:1I<br>0.015 | IC22:3IC18:0IC17:1I<br>0.003 | IC21:2IC19:1IC17:1I<br>0.000 |
|         | IC20:3IC20:0IC17:1I<br>0.002 | IC20:2IC20:1IC17:1I<br>0.002 | IC23:4IC17:0IC17:0I<br>0.000 | IC22:1IC18:3IC17:0I<br>0.000 |
|         | IC22:2IC18:2IC17:0I<br>0.004 | IC22:3IC18:1IC17:0I<br>0.012 | IC22:4IC18:0IC17:0I<br>0.004 | IC20:4IC20:0IC17:0I<br>0.002 |

|         |                              |                              |                              |                              |
|---------|------------------------------|------------------------------|------------------------------|------------------------------|
|         | IC20:3IC20:1IC17:0I<br>0.002 | IC20:2IC20:2IC17:0I<br>0.000 | IC22:5IC18:3IC18:3I<br>0.000 | IC22:6IC18:3IC18:2I<br>0.002 |
|         | IC20:0IC19:1IC18:3I<br>0.001 | IC20:1IC19:0IC18:3I<br>0.001 | IC20:4IC20:4IC18:3I<br>0.000 | IC21:2IC18:2IC18:0I<br>0.018 |
|         | IC20:1IC19:1IC18:2I<br>0.010 | IC20:2IC19:0IC18:2I<br>0.005 | IC21:2IC18:1IC18:1I<br>0.087 | IC20:2IC19:1IC18:1I<br>0.017 |
|         | IC20:3IC19:0IC18:1I<br>0.012 | IC20:3IC19:1IC18:0I<br>0.008 | IC20:4IC19:0IC18:0<br>0.076  |                              |
|         | C23:3IC20:0IC14:0I<br>0.000  | IC22:1IC21:2IC14:0I<br>0.000 | IC22:6IC22:4IC14:0I<br>0.000 | IC22:5IC22:5IC14:0I<br>0.000 |
|         | IC22:1IC19:1IC16:1I<br>0.001 | IC22:2IC19:0IC16:1I<br>0.000 | IC22:5IC20:4IC16:1I<br>0.001 | IC22:6IC20:3IC16:1I<br>0.001 |
|         | IC21:2IC20:0IC16:1I<br>0.000 | IC23:3IC18:0IC16:0I<br>0.010 | IC22:2IC19:1IC16:0I<br>0.004 | IC22:3IC19:0IC16:0I<br>0.003 |
|         | IC22:6IC20:4IC16:0I<br>0.007 | IC21:2IC20:1IC16:0I<br>0.004 | IC22:0IC18:2IC17:1I<br>0.008 | IC22:1IC18:1IC17:1I<br>0.019 |
|         | IC22:2IC18:0IC17:1I<br>0.004 | IC21:2IC19:0IC17:1I<br>0.000 | IC20:2IC20:0IC17:1I<br>0.002 | IC20:1IC20:1IC17:1I<br>0.001 |
| 933.752 | IC23:3IC17:0IC17:0I<br>0.000 | IC22:0IC18:3IC17:0I<br>0.001 | IC22:1IC18:2IC17:0I<br>0.006 | IC22:2IC18:1IC17:0I<br>0.013 |
|         | IC22:3IC18:0IC17:0I<br>0.003 | IC21:2IC19:1IC17:0I<br>0.000 | IC20:3IC20:0IC17:0I<br>0.001 | IC20:2IC20:1IC17:0I<br>0.002 |
|         | IC22:4IC18:3IC18:3I<br>0.000 | IC22:5IC18:3IC18:2I<br>0.002 | IC22:6IC18:3IC18:1I<br>0.007 | IC20:0IC19:0IC18:3I<br>0.001 |
|         | IC20:4IC20:3IC18:3I<br>0.001 | IC22:6IC18:2IC18:2I<br>0.014 | IC20:0IC19:1IC18:2I<br>0.008 | IC20:1IC19:0IC18:2I<br>0.009 |
|         | IC20:4IC20:4IC18:2I<br>0.006 | IC21:2IC18:1IC18:0I<br>0.039 | IC20:1IC19:1IC18:1I<br>0.029 | IC20:2IC19:0IC18:1I<br>0.014 |
|         | IC20:2IC19:1IC18:0I<br>0.004 | IC20:3IC19:0IC18:0I<br>0.008 | IC19:1IC19:1IC19:1<br>0.000  |                              |
| 935.768 | C22:0IC21:2IC14:0I<br>0.000  | IC22:6IC22:3IC14:0I<br>0.000 | IC22:5IC22:4IC14:0I<br>0.000 | IC22:0IC19:1IC16:1I<br>0.001 |
|         | IC22:1IC19:0IC16:1I<br>0.001 | IC22:4IC20:4IC16:1I<br>0.001 | IC22:5IC20:3IC16:1I<br>0.001 | IC22:6IC20:2IC16:1I<br>0.001 |
|         | IC22:1IC19:1IC16:0I<br>0.005 | IC22:2IC19:0IC16:0I<br>0.003 | IC22:5IC20:4IC16:0I<br>0.006 | IC22:6IC20:3IC16:0I<br>0.004 |
|         | IC21:2IC20:0IC16:0I<br>0.003 | IC22:0IC18:1IC17:1I<br>0.022 | IC22:1IC18:0IC17:1I<br>0.004 | IC20:1IC20:0IC17:1I<br>0.002 |
|         | IC22:0IC18:2IC17:0I<br>0.006 | IC22:1IC18:1IC17:0I<br>0.016 | IC22:2IC18:0IC17:0I<br>0.003 | IC21:2IC19:0IC17:0I<br>0.000 |
|         | IC20:2IC20:0IC17:0I<br>0.001 | IC20:1IC20:1IC17:0I<br>0.001 | IC22:3IC18:3IC18:3I<br>0.000 | IC22:4IC18:3IC18:2I<br>0.003 |

|         |                              |                              |                              |                              |
|---------|------------------------------|------------------------------|------------------------------|------------------------------|
|         | IC22:5IC18:3IC18:1I<br>0.006 | IC22:6IC18:3IC18:0I<br>0.004 | IC20:4IC20:2IC18:3I<br>0.001 | IC20:3IC20:3IC18:3I<br>0.000 |
|         | IC22:5IC18:2IC18:2I<br>0.013 | IC22:6IC18:2IC18:1I<br>0.078 | IC20:0IC19:0IC18:2I<br>0.007 | IC20:4IC20:3IC18:2I<br>0.010 |
|         | IC20:0IC19:1IC18:1I<br>0.023 | IC20:1IC19:0IC18:1I<br>0.025 | IC20:4IC20:4IC18:1I<br>0.021 | IC21:2IC18:0IC18:0I<br>0.004 |
|         | IC20:1IC19:1IC18:0I<br>0.007 | IC20:2IC19:0IC18:0I<br>0.004 | IC19:1IC19:1IC19:0<br>0.000  |                              |
|         | C22:6IC22:2IC14:0I<br>0.000  | IC22:5IC22:3IC14:0I<br>0.000 | IC22:4IC22:4IC14:0I<br>0.000 | IC22:0IC19:0IC16:1I<br>0.001 |
|         | IC22:3IC20:4IC16:1I<br>0.001 | IC22:4IC20:3IC16:1I<br>0.001 | IC22:5IC20:2IC16:1I<br>0.001 | IC22:6IC20:1IC16:1I<br>0.001 |
|         | IC22:0IC19:1IC16:0I<br>0.005 | IC22:1IC19:0IC16:0I<br>0.004 | IC22:4IC20:4IC16:0I<br>0.008 | IC22:5IC20:3IC16:0I<br>0.004 |
|         | IC22:6IC20:2IC16:0I<br>0.004 | IC23:4IC18:3IC17:1I<br>0.000 | IC22:0IC18:0IC17:1I<br>0.005 | IC22:6IC19:1IC17:1I<br>0.000 |
|         | IC20:0IC20:0IC17:1I<br>0.001 | IC22:0IC18:1IC17:0I<br>0.018 | IC22:1IC18:0IC17:0I<br>0.004 | IC20:1IC20:0IC17:0I<br>0.002 |
| 937.784 | IC22:2IC18:3IC18:3I<br>0.000 | IC22:3IC18:3IC18:2I<br>0.003 | IC22:4IC18:3IC18:1I<br>0.008 | IC22:5IC18:3IC18:0I<br>0.003 |
|         | IC20:4IC20:1IC18:3I<br>0.002 | IC20:3IC20:2IC18:3I<br>0.001 | IC22:4IC18:2IC18:2I<br>0.016 | IC22:5IC18:2IC18:1I<br>0.073 |
|         | IC22:6IC18:2IC18:0I<br>0.038 | IC20:4IC20:2IC18:2I<br>0.012 | IC20:3IC20:3IC18:2I<br>0.003 | IC22:6IC18:1IC18:1I<br>0.114 |
|         | IC20:0IC19:0IC18:1I<br>0.019 | IC20:4IC20:3IC18:1I<br>0.032 | IC20:0IC19:1IC18:0I<br>0.005 | IC20:1IC19:0IC18:0I<br>0.006 |
|         | IC20:4IC20:4IC18:0I<br>0.078 | IC19:1IC19:0IC19:0<br>0.000  |                              |                              |
| 939.799 | C22:6IC22:1IC14:0I<br>0.000  | IC22:5IC22:2IC14:0I<br>0.000 | IC22:4IC22:3IC14:0I<br>0.000 | IC22:2IC20:4IC16:1I<br>0.001 |
|         | IC22:3IC20:3IC16:1I<br>0.001 | IC22:4IC20:2IC16:1I<br>0.001 | IC22:5IC20:1IC16:1I<br>0.001 | IC22:6IC20:0IC16:1I<br>0.000 |
|         | IC22:0IC19:0IC16:0I<br>0.005 | IC22:3IC20:4IC16:0I<br>0.009 | IC22:4IC20:3IC16:0I<br>0.005 | IC22:5IC20:2IC16:0I<br>0.003 |
|         | IC22:6IC20:1IC16:0I<br>0.006 | IC23:3IC18:3IC17:1I<br>0.000 | IC23:4IC18:2IC17:1I<br>0.001 | IC22:5IC19:1IC17:1I<br>0.000 |
|         | IC22:6IC19:0IC17:1I<br>0.000 | IC21:2IC20:4IC17:1I<br>0.000 | IC23:4IC18:3IC17:0I<br>0.000 | IC22:0IC18:0IC17:0I<br>0.004 |
|         | IC22:6IC19:1IC17:0I<br>0.000 | IC20:0IC20:0IC17:0I<br>0.001 | IC22:1IC18:3IC18:3I<br>0.000 | IC22:2IC18:3IC18:2I<br>0.003 |
|         | IC22:3IC18:3IC18:1I<br>0.009 | IC22:4IC18:3IC18:0I<br>0.002 | IC20:4IC20:0IC18:3I<br>0.001 | IC20:3IC20:1IC18:3I<br>0.001 |

|         |                     |                     |                     |                     |
|---------|---------------------|---------------------|---------------------|---------------------|
|         | IC20:2IC20:2IC18:3I | IC22:3IC18:2IC18:2I | IC22:4IC18:2IC18:1I | IC22:5IC18:2IC18:0I |
|         | 0.000               | 0.019               | 0.095               | 0.034               |
|         | IC20:4IC20:1IC18:2I | IC20:3IC20:2IC18:2I | IC22:5IC18:1IC18:1I | IC22:6IC18:1IC18:0I |
|         | 0.021               | 0.008               | 0.107               | 0.092               |
|         | IC20:4IC20:2IC18:1I | IC20:3IC20:3IC18:1I | IC20:0IC19:0IC18:0I | IC20:4IC20:3IC18:0I |
|         | 0.038               | 0.010               | 0.004               | 0.079               |
|         | IC19:0IC19:0IC19:0  |                     |                     |                     |
|         | 0.000               |                     |                     |                     |
|         | C23:4IC21:2IC14:0I  | IC22:6IC22:0IC14:0I | IC22:5IC22:1IC14:0I | IC22:4IC22:2IC14:0I |
|         | 0.000               | 0.000               | 0.000               | 0.000               |
|         | IC22:3IC22:3IC14:0I | IC23:4IC19:1IC16:1I | IC22:1IC20:4IC16:1I | IC22:2IC20:3IC16:1I |
|         | 0.000               | 0.000               | 0.001               | 0.001               |
|         | IC22:3IC20:2IC16:1I | IC22:4IC20:1IC16:1I | IC22:5IC20:0IC16:1I | IC22:2IC20:4IC16:0I |
|         | 0.001               | 0.001               | 0.000               | 0.009               |
|         | IC22:3IC20:3IC16:0I | IC22:4IC20:2IC16:0I | IC22:5IC20:1IC16:0I | IC22:6IC20:0IC16:0I |
|         | 0.005               | 0.004               | 0.005               | 0.004               |
|         | IC23:3IC18:2IC17:1I | IC23:4IC18:1IC17:1I | IC22:4IC19:1IC17:1I | IC22:5IC19:0IC17:1I |
|         | 0.002               | 0.004               | 0.000               | 0.000               |
|         | IC21:2IC20:3IC17:1I | IC23:3IC18:3IC17:0I | IC23:4IC18:2IC17:0I | IC22:5IC19:1IC17:0I |
| 941.815 | 0.000               | 0.000               | 0.001               | 0.000               |
|         | IC22:6IC19:0IC17:0I | IC21:2IC20:4IC17:0I | IC22:0IC18:3IC18:3I | IC22:1IC18:3IC18:2I |
|         | 0.000               | 0.000               | 0.000               | 0.004               |
|         | IC22:2IC18:3IC18:1I | IC22:3IC18:3IC18:0I | IC21:2IC19:1IC18:3I | IC20:3IC20:0IC18:3I |
|         | 0.009               | 0.002               | 0.000               | 0.001               |
|         | IC20:2IC20:1IC18:3I | IC22:2IC18:2IC18:2I | IC22:3IC18:2IC18:1I | IC22:4IC18:2IC18:0I |
|         | 0.001               | 0.019               | 0.108               | 0.034               |
|         | IC20:4IC20:0IC18:2I | IC20:3IC20:1IC18:2I | IC20:2IC20:2IC18:2I | IC22:4IC18:1IC18:1I |
|         | 0.016               | 0.014               | 0.004               | 0.138               |
|         | IC22:5IC18:1IC18:0I | IC20:4IC20:1IC18:1I | IC20:3IC20:2IC18:1I | IC22:6IC18:0IC18:0I |
|         | 0.081               | 0.067               | 0.023               | 0.036               |
|         | IC20:4IC20:2IC18:0I | IC20:3IC20:3IC18:0I | IC20:4IC19:1IC19:1  |                     |
|         | 0.086               | 0.007               | 0.000               |                     |
| 943.831 | C23:3IC21:2IC14:0I  | IC22:5IC22:0IC14:0I | IC22:4IC22:1IC14:0I | IC22:3IC22:2IC14:0I |
|         | 0.000               | 0.000               | 0.000               | 0.000               |
|         | IC23:3IC19:1IC16:1I | IC23:4IC19:0IC16:1I | IC22:0IC20:4IC16:1I | IC22:1IC20:3IC16:1I |
|         | 0.000               | 0.000               | 0.002               | 0.001               |
|         | IC22:2IC20:2IC16:1I | IC22:3IC20:1IC16:1I | IC22:4IC20:0IC16:1I | IC21:2IC21:2IC16:1I |
|         | 0.001               | 0.001               | 0.001               | 0.000               |
|         | IC23:4IC19:1IC16:0I | IC22:1IC20:4IC16:0I | IC22:2IC20:3IC16:0I | IC22:3IC20:2IC16:0I |
|         | 0.001               | 0.012               | 0.005               | 0.005               |
|         | IC22:4IC20:1IC16:0I | IC22:5IC20:0IC16:0I | IC23:3IC18:1IC17:1I | IC23:4IC18:0IC17:1I |
|         | 0.006               | 0.003               | 0.004               | 0.001               |

|         |                              |                              |                              |                              |
|---------|------------------------------|------------------------------|------------------------------|------------------------------|
|         | IC22:3IC19:1IC17:1I<br>0.000 | IC22:4IC19:0IC17:1I<br>0.000 | IC21:2IC20:2IC17:1I<br>0.000 | IC23:3IC18:2IC17:0I<br>0.001 |
|         | IC23:4IC18:1IC17:0I<br>0.003 | IC22:4IC19:1IC17:0I<br>0.000 | IC22:5IC19:0IC17:0I<br>0.000 | IC21:2IC20:3IC17:0I<br>0.000 |
|         | IC22:0IC18:3IC18:2I<br>0.005 | IC22:1IC18:3IC18:1I<br>0.011 | IC22:2IC18:3IC18:0I<br>0.002 | IC21:2IC19:0IC18:3I<br>0.000 |
|         | IC20:2IC20:0IC18:3I<br>0.001 | IC20:1IC20:1IC18:3I<br>0.001 | IC22:1IC18:2IC18:2I<br>0.024 | IC22:2IC18:2IC18:1I<br>0.110 |
|         | IC22:3IC18:2IC18:0I<br>0.033 | IC21:2IC19:1IC18:2I<br>0.001 | IC20:3IC20:0IC18:2I<br>0.011 | IC20:2IC20:1IC18:2I<br>0.014 |
|         | IC22:3IC18:1IC18:1I<br>0.157 | IC22:4IC18:1IC18:0I<br>0.077 | IC20:4IC20:0IC18:1I<br>0.051 | IC20:3IC20:1IC18:1I<br>0.041 |
|         | IC20:2IC20:2IC18:1I<br>0.011 | IC22:5IC18:0IC18:0I<br>0.026 | IC20:4IC20:1IC18:0I<br>0.152 | IC20:3IC20:2IC18:0I<br>0.011 |
|         | IC20:3IC19:1IC19:1I<br>0.000 | IC20:4IC19:1IC19:0<br>0.000  |                              |                              |
|         | C22:4IC22:0IC14:0I<br>0.000  | IC22:3IC22:1IC14:0I<br>0.000 | IC22:2IC22:2IC14:0I<br>0.000 | IC23:3IC19:0IC16:1I<br>0.000 |
|         | IC22:0IC20:3IC16:1I<br>0.001 | IC22:1IC20:2IC16:1I<br>0.001 | IC22:2IC20:1IC16:1I<br>0.001 | IC22:3IC20:0IC16:1I<br>0.001 |
|         | IC23:3IC19:1IC16:0I<br>0.001 | IC23:4IC19:0IC16:0I<br>0.001 | IC22:0IC20:4IC16:0I<br>0.014 | IC22:1IC20:3IC16:0I<br>0.007 |
|         | IC22:2IC20:2IC16:0I<br>0.005 | IC22:3IC20:1IC16:0I<br>0.007 | IC22:4IC20:0IC16:0I<br>0.004 | IC21:2IC21:2IC16:0I<br>0.000 |
|         | IC23:3IC18:0IC17:1I<br>0.001 | IC22:2IC19:1IC17:1I<br>0.000 | IC22:3IC19:0IC17:1I<br>0.000 | IC22:6IC20:4IC17:1I<br>0.001 |
|         | IC21:2IC20:1IC17:1I<br>0.000 | IC23:3IC18:1IC17:0I<br>0.004 | IC23:4IC18:0IC17:0I<br>0.001 | IC22:3IC19:1IC17:0I<br>0.000 |
| 945.846 | IC22:4IC19:0IC17:0I<br>0.000 | IC21:2IC20:2IC17:0I<br>0.000 | IC22:0IC18:3IC18:1I<br>0.013 | IC22:1IC18:3IC18:0I<br>0.003 |
|         | IC20:1IC20:0IC18:3I<br>0.001 | IC22:0IC18:2IC18:2I<br>0.028 | IC22:1IC18:2IC18:1I<br>0.137 | IC22:2IC18:2IC18:0I<br>0.033 |
|         | IC21:2IC19:0IC18:2I<br>0.001 | IC20:2IC20:0IC18:2I<br>0.011 | IC20:1IC20:1IC18:2I<br>0.010 | IC22:2IC18:1IC18:1I<br>0.160 |
|         | IC22:3IC18:1IC18:0I<br>0.071 | IC21:2IC19:1IC18:1I<br>0.004 | IC20:3IC20:0IC18:1I<br>0.031 | IC20:2IC20:1IC18:1I<br>0.040 |
|         | IC22:4IC18:0IC18:0I<br>0.015 | IC20:4IC20:0IC18:0I<br>0.116 | IC20:3IC20:1IC18:0I<br>0.019 | IC20:2IC20:2IC18:0I<br>0.003 |
|         | IC20:2IC19:1IC19:1I<br>0.000 | IC20:3IC19:1IC19:0I<br>0.000 | IC20:4IC19:0IC19:0<br>0.000  |                              |
| 947.862 | C23:4IC22:6IC14:0I<br>0.000  | IC22:3IC22:0IC14:0I<br>0.000 | IC22:2IC22:1IC14:0I<br>0.000 | IC22:0IC20:2IC16:1I<br>0.001 |



|         |                              |                              |                              |                              |
|---------|------------------------------|------------------------------|------------------------------|------------------------------|
|         | IC22:1IC20:1IC16:1I<br>0.001 | IC22:2IC20:0IC16:1I<br>0.001 | IC23:3IC19:0IC16:0I<br>0.001 | IC22:0IC20:3IC16:0I<br>0.008 |
|         | IC22:1IC20:2IC16:0I<br>0.006 | IC22:2IC20:1IC16:0I<br>0.007 | IC22:3IC20:0IC16:0I<br>0.005 | IC22:1IC19:1IC17:1I<br>0.000 |
|         | IC22:2IC19:0IC17:1I<br>0.000 | IC22:5IC20:4IC17:1I<br>0.000 | IC22:6IC20:3IC17:1I<br>0.000 | IC21:2IC20:0IC17:1I<br>0.000 |
|         | IC23:3IC18:0IC17:0I<br>0.001 | IC22:2IC19:1IC17:0I<br>0.000 | IC22:3IC19:0IC17:0I<br>0.000 | IC22:6IC20:4IC17:0I<br>0.000 |
|         | IC21:2IC20:1IC17:0I<br>0.000 | IC23:4IC18:3IC18:3I<br>0.000 | IC22:0IC18:3IC18:0I<br>0.003 | IC22:6IC19:1IC18:3I<br>0.000 |
|         | IC20:0IC20:0IC18:3I<br>0.000 | IC22:0IC18:2IC18:1I<br>0.159 | IC22:1IC18:2IC18:0I<br>0.041 | IC20:1IC20:0IC18:2I<br>0.016 |
|         | IC22:1IC18:1IC18:1I<br>0.199 | IC22:2IC18:1IC18:0I<br>0.072 | IC21:2IC19:0IC18:1I<br>0.004 | IC20:2IC20:0IC18:1I<br>0.031 |
|         | IC20:1IC20:1IC18:1I<br>0.029 | IC22:3IC18:0IC18:0I<br>0.008 | IC21:2IC19:1IC18:0I<br>0.001 | IC20:3IC20:0IC18:0I<br>0.015 |
|         | IC20:2IC20:1IC18:0I<br>0.010 | IC20:1IC19:1IC19:1I<br>0.000 | IC20:2IC19:1IC19:0I<br>0.000 | IC20:3IC19:0IC19:0<br>0.000  |
|         | C23:3IC22:6IC14:0I<br>0.000  | IC23:4IC22:5IC14:0I<br>0.000 | IC22:2IC22:0IC14:0I<br>0.000 | IC22:1IC22:1IC14:0I<br>0.000 |
|         | IC23:4IC20:4IC16:1I<br>0.000 | IC22:0IC20:1IC16:1I<br>0.002 | IC22:1IC20:0IC16:1I<br>0.001 | IC22:6IC21:2IC16:1I<br>0.000 |
|         | IC22:0IC20:2IC16:0I<br>0.007 | IC22:1IC20:1IC16:0I<br>0.009 | IC22:2IC20:0IC16:0I<br>0.005 | IC22:0IC19:1IC17:1I<br>0.001 |
|         | IC22:1IC19:0IC17:1I<br>0.000 | IC22:4IC20:4IC17:1I<br>0.001 | IC22:5IC20:3IC17:1I<br>0.000 | IC22:6IC20:2IC17:1I<br>0.000 |
|         | IC22:1IC19:1IC17:0I<br>0.000 | IC22:2IC19:0IC17:0I<br>0.000 | IC22:5IC20:4IC17:0I<br>0.000 | IC22:6IC20:3IC17:0I<br>0.000 |
| 949.878 | IC21:2IC20:0IC17:0I<br>0.000 | IC23:3IC18:3IC18:3I<br>0.000 | IC23:4IC18:3IC18:2I<br>0.001 | IC22:5IC19:1IC18:3I<br>0.000 |
|         | IC22:6IC19:0IC18:3I<br>0.000 | IC21:2IC20:4IC18:3I<br>0.000 | IC22:0IC18:2IC18:0I<br>0.048 | IC22:6IC19:1IC18:2I<br>0.002 |
|         | IC20:0IC20:0IC18:2I<br>0.005 | IC22:0IC18:1IC18:1I<br>0.232 | IC22:1IC18:1IC18:0I<br>0.090 | IC20:1IC20:0IC18:1I<br>0.045 |
|         | IC22:2IC18:0IC18:0I<br>0.008 | IC21:2IC19:0IC18:0I<br>0.001 | IC20:2IC20:0IC18:0I<br>0.007 | IC20:1IC20:1IC18:0I<br>0.007 |
|         | IC20:0IC19:1IC19:1I<br>0.000 | IC20:1IC19:1IC19:0I<br>0.001 | IC20:4IC20:4IC19:1I<br>0.000 | IC20:2IC19:0IC19:0<br>0.000  |
| 951.893 | C23:3IC22:5IC14:0I<br>0.000  | IC23:4IC22:4IC14:0I<br>0.000 | IC22:1IC22:0IC14:0I<br>0.000 | IC23:3IC20:4IC16:1I<br>0.000 |
|         | IC23:4IC20:3IC16:1I<br>0.000 | IC22:0IC20:0IC16:1I<br>0.001 | IC22:5IC21:2IC16:1I<br>0.000 | IC23:4IC20:4IC16:0I<br>0.002 |

|         |                              |                              |                              |                              |
|---------|------------------------------|------------------------------|------------------------------|------------------------------|
|         | IC22:0IC20:1IC16:0I<br>0.011 | IC22:1IC20:0IC16:0I<br>0.006 | IC22:6IC21:2IC16:0I<br>0.001 | IC22:0IC19:0IC17:1I<br>0.000 |
|         | IC22:3IC20:4IC17:1I<br>0.001 | IC22:4IC20:3IC17:1I<br>0.000 | IC22:5IC20:2IC17:1I<br>0.000 | IC22:6IC20:1IC17:1I<br>0.001 |
|         | IC22:0IC19:1IC17:0I<br>0.000 | IC22:1IC19:0IC17:0I<br>0.000 | IC22:4IC20:4IC17:0I<br>0.001 | IC22:5IC20:3IC17:0I<br>0.000 |
|         | IC22:6IC20:2IC17:0I<br>0.000 | IC23:3IC18:3IC18:2I<br>0.001 | IC23:4IC18:3IC18:1I<br>0.002 | IC22:4IC19:1IC18:3I<br>0.000 |
|         | IC22:5IC19:0IC18:3I<br>0.000 | IC21:2IC20:3IC18:3I<br>0.000 | IC23:4IC18:2IC18:2I<br>0.005 | IC22:5IC19:1IC18:2I<br>0.002 |
|         | IC22:6IC19:0IC18:2I<br>0.002 | IC21:2IC20:4IC18:2I<br>0.003 | IC22:0IC18:1IC18:0I<br>0.105 | IC22:6IC19:1IC18:1I<br>0.005 |
|         | IC20:0IC20:0IC18:1I<br>0.014 | IC22:1IC18:0IC18:0I<br>0.010 | IC20:1IC20:0IC18:0I<br>0.010 | IC20:0IC19:1IC19:0I<br>0.000 |
|         | IC20:4IC20:3IC19:1I<br>0.001 | IC20:1IC19:0IC19:0I<br>0.000 | IC20:4IC20:4IC19:0<br>0.000  |                              |
|         | C23:3IC22:2IC14:0I<br>0.000  | IC23:4IC22:1IC14:0I<br>0.000 | IC23:3IC20:1IC16:1I<br>0.000 | IC23:4IC20:0IC16:1I<br>0.000 |
|         | IC22:2IC21:2IC16:1I<br>0.000 | IC22:6IC22:5IC16:1I<br>0.000 | IC23:3IC20:2IC16:0I<br>0.001 | IC23:4IC20:1IC16:0I<br>0.002 |
|         | IC22:3IC21:2IC16:0I<br>0.001 | IC22:6IC22:6IC16:0I<br>0.001 | IC23:3IC19:1IC17:1I<br>0.000 | IC23:4IC19:0IC17:1I<br>0.000 |
|         | IC22:0IC20:4IC17:1I<br>0.001 | IC22:1IC20:3IC17:1I<br>0.001 | IC22:2IC20:2IC17:1I<br>0.001 | IC22:3IC20:1IC17:1I<br>0.001 |
|         | IC22:4IC20:0IC17:1I<br>0.000 | IC21:2IC21:2IC17:1I<br>0.000 | IC23:4IC19:1IC17:0I<br>0.000 | IC22:1IC20:4IC17:0I<br>0.001 |
|         | IC22:2IC20:3IC17:0I<br>0.000 | IC22:3IC20:2IC17:0I<br>0.000 | IC22:4IC20:1IC17:0I<br>0.001 | IC22:5IC20:0IC17:0I<br>0.000 |
| 957.752 | IC22:1IC19:1IC18:3I<br>0.000 | IC22:2IC19:0IC18:3I<br>0.000 | IC22:5IC20:4IC18:3I<br>0.000 | IC22:6IC20:3IC18:3I<br>0.000 |
|         | IC21:2IC20:0IC18:3I<br>0.000 | IC23:3IC18:2IC18:0I<br>0.009 | IC22:2IC19:1IC18:2I<br>0.003 | IC22:3IC19:0IC18:2I<br>0.002 |
|         | IC22:6IC20:4IC18:2I<br>0.004 | IC21:2IC20:1IC18:2I<br>0.003 | IC23:3IC18:1IC18:1I<br>0.045 | IC23:4IC18:1IC18:0I<br>0.017 |
|         | IC22:3IC19:1IC18:1I<br>0.008 | IC22:4IC19:0IC18:1I<br>0.006 | IC21:2IC20:2IC18:1I<br>0.006 | IC22:4IC19:1IC18:0I<br>0.002 |
|         | IC22:5IC19:0IC18:0I<br>0.003 | IC21:2IC20:3IC18:0I<br>0.003 | IC20:4IC20:0IC19:1I<br>0.001 | IC20:3IC20:1IC19:1I<br>0.001 |
|         | IC20:2IC20:2IC19:1I<br>0.000 | IC20:4IC20:1IC19:0I<br>0.001 | IC20:3IC20:2IC19:0I<br>0.000 | IC20:4IC20:4IC20:4<br>0.000  |
| 959.768 | C23:3IC22:1IC14:0I<br>0.000  | IC23:4IC22:0IC14:0I<br>0.000 | IC23:3IC20:0IC16:1I<br>0.000 | IC22:1IC21:2IC16:1I<br>0.000 |

|                     |                     |                     |                     |
|---------------------|---------------------|---------------------|---------------------|
| IC22:6IC22:4IC16:1I | IC22:5IC22:5IC16:1I | IC23:3IC20:1IC16:0I | IC23:4IC20:0IC16:0I |
| 0.000               | 0.000               | 0.002               | 0.001               |
| IC22:2IC21:2IC16:0I | IC22:6IC22:5IC16:0I | IC23:3IC19:0IC17:1I | IC22:0IC20:3IC17:1I |
| 0.001               | 0.003               | 0.000               | 0.001               |
| IC22:1IC20:2IC17:1I | IC22:2IC20:1IC17:1I | IC22:3IC20:0IC17:1I | IC23:3IC19:1IC17:0I |
| 0.001               | 0.001               | 0.000               | 0.000               |
| IC23:4IC19:0IC17:0I | IC22:0IC20:4IC17:0I | IC22:1IC20:3IC17:0I | IC22:2IC20:2IC17:0I |
| 0.000               | 0.001               | 0.001               | 0.000               |
| IC22:3IC20:1IC17:0I | IC22:4IC20:0IC17:0I | IC21:2IC21:2IC17:0I | IC22:0IC19:1IC18:3I |
| 0.001               | 0.000               | 0.000               | 0.000               |
| IC22:1IC19:0IC18:3I | IC22:4IC20:4IC18:3I | IC22:5IC20:3IC18:3I | IC22:6IC20:2IC18:3I |
| 0.000               | 0.000               | 0.000               | 0.000               |
| IC22:1IC19:1IC18:2I | IC22:2IC19:0IC18:2I | IC22:5IC20:4IC18:2I | IC22:6IC20:3IC18:2I |
| 0.003               | 0.002               | 0.004               | 0.003               |
| IC21:2IC20:0IC18:2I | IC23:3IC18:1IC18:0I | IC22:2IC19:1IC18:1I | IC22:3IC19:0IC18:1I |
| 0.002               | 0.020               | 0.008               | 0.006               |
| IC22:6IC20:4IC18:1I | IC21:2IC20:1IC18:1I | IC23:4IC18:0IC18:0I | IC22:3IC19:1IC18:0I |
| 0.012               | 0.008               | 0.002               | 0.002               |
| IC22:4IC19:0IC18:0I | IC21:2IC20:2IC18:0I | IC21:2IC19:1IC19:1I | IC20:3IC20:0IC19:1I |
| 0.002               | 0.001               | 0.000               | 0.001               |
| IC20:2IC20:1IC19:1I | IC20:4IC20:0IC19:0I | IC20:3IC20:1IC19:0I | IC20:2IC20:2IC19:0I |
| 0.001               | 0.001               | 0.001               | 0.000               |
| IC20:4IC20:4IC20:3  |                     |                     |                     |
| 0.001               |                     |                     |                     |

---

|         |                     |                     |                     |                     |
|---------|---------------------|---------------------|---------------------|---------------------|
| 961.784 | C23:3IC22:0IC14:0I  | IC22:0IC21:2IC16:1I | IC22:6IC22:3IC16:1I | IC22:5IC22:4IC16:1I |
|         | 0.000               | 0.000               | 0.001               | 0.000               |
|         | IC23:3IC20:0IC16:0I | IC22:1IC21:2IC16:0I | IC22:6IC22:4IC16:0I | IC22:5IC22:5IC16:0I |
|         | 0.001               | 0.002               | 0.003               | 0.001               |
|         | IC22:0IC20:2IC17:1I | IC22:1IC20:1IC17:1I | IC22:2IC20:0IC17:1I | IC23:3IC19:0IC17:0I |
|         | 0.001               | 0.001               | 0.000               | 0.000               |
|         | IC22:0IC20:3IC17:0I | IC22:1IC20:2IC17:0I | IC22:2IC20:1IC17:0I | IC22:3IC20:0IC17:0I |
|         | 0.001               | 0.001               | 0.001               | 0.000               |
|         | IC22:0IC19:0IC18:3I | IC22:3IC20:4IC18:3I | IC22:4IC20:3IC18:3I | IC22:5IC20:2IC18:3I |
|         | 0.000               | 0.000               | 0.000               | 0.000               |
|         | IC22:6IC20:1IC18:3I | IC22:0IC19:1IC18:2I | IC22:1IC19:0IC18:2I | IC22:4IC20:4IC18:2I |
|         | 0.000               | 0.004               | 0.003               | 0.005               |
|         | IC22:5IC20:3IC18:2I | IC22:6IC20:2IC18:2I | IC22:1IC19:1IC18:1I | IC22:2IC19:0IC18:1I |
|         | 0.003               | 0.003               | 0.010               | 0.007               |
|         | IC22:5IC20:4IC18:1I | IC22:6IC20:3IC18:1I | IC21:2IC20:0IC18:1I | IC23:3IC18:0IC18:0I |
|         | 0.012               | 0.008               | 0.005               | 0.002               |
|         | IC22:2IC19:1IC18:0I | IC22:3IC19:0IC18:0I | IC22:6IC20:4IC18:0I | IC21:2IC20:1IC18:0I |
|         | 0.002               | 0.001               | 0.030               | 0.002               |

|         |                     |                     |                     |                     |
|---------|---------------------|---------------------|---------------------|---------------------|
|         | IC21:2IC19:1IC19:0I | IC20:2IC20:0IC19:1I | IC20:1IC20:1IC19:1I | IC20:3IC20:0IC19:0I |
|         | 0.000               | 0.001               | 0.001               | 0.001               |
|         | IC20:2IC20:1IC19:0I | IC20:4IC20:4IC20:2I | IC20:4IC20:3IC20:3  |                     |
|         | 0.001               | 0.001               | 0.000               |                     |
|         | C22:6IC22:2IC16:1I  | IC22:5IC22:3IC16:1I | IC22:4IC22:4IC16:1I | IC22:0IC21:2IC16:0I |
|         | 0.001               | 0.000               | 0.000               | 0.002               |
|         | IC22:6IC22:3IC16:0I | IC22:5IC22:4IC16:0I | IC23:4IC20:4IC17:1I | IC22:0IC20:1IC17:1I |
|         | 0.004               | 0.003               | 0.000               | 0.001               |
|         | IC22:1IC20:0IC17:1I | IC22:6IC21:2IC17:1I | IC22:0IC20:2IC17:0I | IC22:1IC20:1IC17:0I |
|         | 0.001               | 0.000               | 0.001               | 0.001               |
|         | IC22:2IC20:0IC17:0I | IC22:2IC20:4IC18:3I | IC22:3IC20:3IC18:3I | IC22:4IC20:2IC18:3I |
|         | 0.000               | 0.000               | 0.000               | 0.000               |
|         | IC22:5IC20:1IC18:3I | IC22:6IC20:0IC18:3I | IC22:0IC19:0IC18:2I | IC22:3IC20:4IC18:2I |
| 963.799 | 0.000               | 0.000               | 0.003               | 0.006               |
|         | IC22:4IC20:3IC18:2I | IC22:5IC20:2IC18:2I | IC22:6IC20:1IC18:2I | IC22:0IC19:1IC18:1I |
|         | 0.003               | 0.002               | 0.004               | 0.011               |
|         | IC22:1IC19:0IC18:1I | IC22:4IC20:4IC18:1I | IC22:5IC20:3IC18:1I | IC22:6IC20:2IC18:1I |
|         | 0.008               | 0.015               | 0.007               | 0.007               |
|         | IC22:1IC19:1IC18:0I | IC22:2IC19:0IC18:0I | IC22:5IC20:4IC18:0I | IC22:6IC20:3IC18:0I |
|         | 0.002               | 0.002               | 0.028               | 0.005               |
|         | IC21:2IC20:0IC18:0I | IC20:1IC20:0IC19:1I | IC21:2IC19:0IC19:0I | IC20:2IC20:0IC19:0I |
|         | 0.001               | 0.001               | 0.000               | 0.001               |
|         | IC20:1IC20:1IC19:0I | IC20:4IC20:4IC20:1I | IC20:4IC20:3IC20:2I | IC20:3IC20:3IC20:3  |
|         | 0.001               | 0.001               | 0.001               | 0.000               |
| 965.815 | C23:4IC23:4IC14:0I  | IC22:6IC22:1IC16:1I | IC22:5IC22:2IC16:1I | IC22:4IC22:3IC16:1I |
|         | 0.000               | 0.001               | 0.000               | 0.000               |
|         | IC22:6IC22:2IC16:0I | IC22:5IC22:3IC16:0I | IC22:4IC22:4IC16:0I | IC23:3IC20:4IC17:1I |
|         | 0.004               | 0.003               | 0.001               | 0.000               |
|         | IC23:4IC20:3IC17:1I | IC22:0IC20:0IC17:1I | IC22:5IC21:2IC17:1I | IC23:4IC20:4IC17:0I |
|         | 0.000               | 0.001               | 0.000               | 0.000               |
|         | IC22:0IC20:1IC17:0I | IC22:1IC20:0IC17:0I | IC22:6IC21:2IC17:0I | IC23:4IC19:1IC18:3I |
|         | 0.001               | 0.000               | 0.000               | 0.000               |
|         | IC22:1IC20:4IC18:3I | IC22:2IC20:3IC18:3I | IC22:3IC20:2IC18:3I | IC22:4IC20:1IC18:3I |
|         | 0.001               | 0.000               | 0.000               | 0.000               |
|         | IC22:5IC20:0IC18:3I | IC22:2IC20:4IC18:2I | IC22:3IC20:3IC18:2I | IC22:4IC20:2IC18:2I |
|         | 0.000               | 0.006               | 0.004               | 0.003               |
|         | IC22:5IC20:1IC18:2I | IC22:6IC20:0IC18:2I | IC22:0IC19:0IC18:1I | IC22:3IC20:4IC18:1I |
|         | 0.004               | 0.002               | 0.010               | 0.017               |
|         | IC22:4IC20:3IC18:1I | IC22:5IC20:2IC18:1I | IC22:6IC20:1IC18:1I | IC22:0IC19:1IC18:0I |
|         | 0.009               | 0.007               | 0.011               | 0.003               |
|         | IC22:1IC19:0IC18:0I | IC22:4IC20:4IC18:0I | IC22:5IC20:3IC18:0I | IC22:6IC20:2IC18:0I |
|         | 0.002               | 0.035               | 0.005               | 0.003               |

|         |                     |                     |                     |                     |
|---------|---------------------|---------------------|---------------------|---------------------|
|         | IC22:6IC19:1IC19:1I | IC20:0IC20:0IC19:1I | IC20:1IC20:0IC19:0I | IC20:4IC20:4IC20:0I |
|         | 0.000               | 0.000               | 0.001               | 0.001               |
|         | IC20:4IC20:3IC20:1I | IC20:4IC20:2IC20:2I | IC20:3IC20:3IC20:2I |                     |
|         | 0.002               | 0.001               | 0.000               |                     |
|         | C23:4IC23:3IC14:0I  | IC23:4IC21:2IC16:1I | IC22:6IC22:0IC16:1I | IC22:5IC22:1IC16:1I |
|         | 0.000               | 0.000               | 0.001               | 0.001               |
|         | IC22:4IC22:2IC16:1I | IC22:3IC22:3IC16:1I | IC22:6IC22:1IC16:0I | IC22:5IC22:2IC16:0I |
|         | 0.000               | 0.000               | 0.005               | 0.003               |
|         | IC22:4IC22:3IC16:0I | IC23:3IC20:3IC17:1I | IC23:4IC20:2IC17:1I | IC22:4IC21:2IC17:1I |
|         | 0.003               | 0.000               | 0.000               | 0.000               |
|         | IC23:3IC20:4IC17:0I | IC23:4IC20:3IC17:0I | IC22:0IC20:0IC17:0I | IC22:5IC21:2IC17:0I |
|         | 0.000               | 0.000               | 0.001               | 0.000               |
|         | IC23:3IC19:1IC18:3I | IC23:4IC19:0IC18:3I | IC22:0IC20:4IC18:3I | IC22:1IC20:3IC18:3I |
|         | 0.000               | 0.000               | 0.001               | 0.000               |
|         | IC22:2IC20:2IC18:3I | IC22:3IC20:1IC18:3I | IC22:4IC20:0IC18:3I | IC21:2IC21:2IC18:3I |
| 967.831 | 0.000               | 0.000               | 0.000               | 0.000               |
|         | IC23:4IC19:1IC18:2I | IC22:1IC20:4IC18:2I | IC22:2IC20:3IC18:2I | IC22:3IC20:2IC18:2I |
|         | 0.001               | 0.007               | 0.004               | 0.004               |
|         | IC22:4IC20:1IC18:2I | IC22:5IC20:0IC18:2I | IC22:2IC20:4IC18:1I | IC22:3IC20:3IC18:1I |
|         | 0.005               | 0.002               | 0.017               | 0.011               |
|         | IC22:4IC20:2IC18:1I | IC22:5IC20:1IC18:1I | IC22:6IC20:0IC18:1I | IC22:0IC19:0IC18:0I |
|         | 0.009               | 0.010               | 0.007               | 0.002               |
|         | IC22:3IC20:4IC18:0I | IC22:4IC20:3IC18:0I | IC22:5IC20:2IC18:0I | IC22:6IC20:1IC18:0I |
|         | 0.039               | 0.005               | 0.003               | 0.008               |
|         | IC22:5IC19:1IC19:1I | IC22:6IC19:1IC19:0I | IC21:2IC20:4IC19:1I | IC20:0IC20:0IC19:0I |
|         | 0.000               | 0.000               | 0.000               | 0.000               |
|         | IC20:4IC20:3IC20:0I | IC20:4IC20:2IC20:1I | IC20:3IC20:3IC20:1I | IC20:3IC20:2IC20:2I |
|         | 0.002               | 0.002               | 0.001               | 0.000               |
| 969.846 | C23:3IC23:3IC14:0I  | IC23:3IC21:2IC16:1I | IC22:5IC22:0IC16:1I | IC22:4IC22:1IC16:1I |
|         | 0.000               | 0.000               | 0.001               | 0.001               |
|         | IC22:3IC22:2IC16:1I | IC23:4IC21:2IC16:0I | IC22:6IC22:0IC16:0I | IC22:5IC22:1IC16:0I |
|         | 0.000               | 0.000               | 0.006               | 0.004               |
|         | IC22:4IC22:2IC16:0I | IC22:3IC22:3IC16:0I | IC23:3IC20:2IC17:1I | IC23:4IC20:1IC17:1I |
|         | 0.003               | 0.001               | 0.000               | 0.000               |
|         | IC22:3IC21:2IC17:1I | IC22:6IC22:6IC17:1I | IC23:3IC20:3IC17:0I | IC23:4IC20:2IC17:0I |
|         | 0.000               | 0.000               | 0.000               | 0.000               |
|         | IC22:4IC21:2IC17:0I | IC23:3IC19:0IC18:3I | IC22:0IC20:3IC18:3I | IC22:1IC20:2IC18:3I |
|         | 0.000               | 0.000               | 0.000               | 0.000               |
|         | IC22:2IC20:1IC18:3I | IC22:3IC20:0IC18:3I | IC23:3IC19:1IC18:2I | IC23:4IC19:0IC18:2I |
|         | 0.000               | 0.000               | 0.001               | 0.001               |
|         | IC22:0IC20:4IC18:2I | IC22:1IC20:3IC18:2I | IC22:2IC20:2IC18:2I | IC22:3IC20:1IC18:2I |
|         | 0.008               | 0.005               | 0.004               | 0.005               |

|         |                              |                              |                              |                              |
|---------|------------------------------|------------------------------|------------------------------|------------------------------|
|         | IC22:4IC20:0IC18:2I<br>0.003 | IC21:2IC21:2IC18:2I<br>0.000 | IC23:4IC19:1IC18:1I<br>0.002 | IC22:1IC20:4IC18:1I<br>0.022 |
|         | IC22:2IC20:3IC18:1I<br>0.011 | IC22:3IC20:2IC18:1I<br>0.010 | IC22:4IC20:1IC18:1I<br>0.013 | IC22:5IC20:0IC18:1I<br>0.006 |
|         | IC22:2IC20:4IC18:0I<br>0.040 | IC22:3IC20:3IC18:0I<br>0.005 | IC22:4IC20:2IC18:0I<br>0.003 | IC22:5IC20:1IC18:0I<br>0.006 |
|         | IC22:6IC20:0IC18:0I<br>0.006 | IC22:4IC19:1IC19:1I<br>0.000 | IC22:5IC19:1IC19:0I<br>0.000 | IC21:2IC20:3IC19:1I<br>0.000 |
|         | IC22:6IC19:0IC19:0I<br>0.000 | IC21:2IC20:4IC19:0I<br>0.000 | IC20:4IC20:2IC20:0I<br>0.001 | IC20:4IC20:1IC20:1I<br>0.001 |
|         | IC20:3IC20:3IC20:0I<br>0.001 | IC20:3IC20:2IC20:1I<br>0.001 | IC20:2IC20:2IC20:2<br>0.000  |                              |
|         | C23:3IC22:0IC16:1I<br>0.000  | IC23:3IC22:1IC16:0I<br>0.001 | IC23:4IC22:0IC16:0I<br>0.001 | IC23:4IC22:6IC17:1I<br>0.000 |
|         | IC22:3IC22:0IC17:1I<br>0.000 | IC22:2IC22:1IC17:1I<br>0.000 | IC22:4IC22:0IC17:0I<br>0.000 | IC22:3IC22:1IC17:0I<br>0.000 |
|         | IC22:2IC22:2IC17:0I<br>0.000 | IC22:6IC22:2IC18:3I<br>0.000 | IC22:5IC22:3IC18:3I<br>0.000 | IC22:4IC22:4IC18:3I<br>0.000 |
|         | IC22:0IC21:2IC18:2I<br>0.001 | IC22:6IC22:3IC18:2I<br>0.003 | IC22:5IC22:4IC18:2I<br>0.002 | IC23:3IC20:0IC18:1I<br>0.003 |
|         | IC22:1IC21:2IC18:1I<br>0.003 | IC22:6IC22:4IC18:1I<br>0.007 | IC22:5IC22:5IC18:1I<br>0.002 | IC23:3IC20:1IC18:0I<br>0.001 |
| 987.799 | IC23:4IC20:0IC18:0I<br>0.001 | IC22:2IC21:2IC18:0I<br>0.001 | IC22:6IC22:5IC18:0I<br>0.003 | IC23:3IC19:1IC19:0I<br>0.000 |
|         | IC22:0IC20:3IC19:1I<br>0.000 | IC22:1IC20:2IC19:1I<br>0.000 | IC22:2IC20:1IC19:1I<br>0.000 | IC22:3IC20:0IC19:1I<br>0.000 |
|         | IC23:4IC19:0IC19:0I<br>0.000 | IC22:0IC20:4IC19:0I<br>0.000 | IC22:1IC20:3IC19:0I<br>0.000 | IC22:2IC20:2IC19:0I<br>0.000 |
|         | IC22:3IC20:1IC19:0I<br>0.000 | IC22:4IC20:0IC19:0I<br>0.000 | IC21:2IC21:2IC19:0I<br>0.000 | IC22:3IC20:4IC20:4I<br>0.000 |
|         | IC22:4IC20:4IC20:3I<br>0.000 | IC22:5IC20:4IC20:2I<br>0.000 | IC22:6IC20:4IC20:1I<br>0.001 | IC22:5IC20:3IC20:3I<br>0.000 |
|         | IC22:6IC20:3IC20:2I<br>0.000 | IC21:2IC20:2IC20:0I<br>0.000 | IC21:2IC20:1IC20:1<br>0.000  |                              |
